# Supplementary material
Source: publisher figshare collection journal article supplement (https://springernature.figshare.com/ndownloader/files/18094505)
Supplement: Supplementary file [file 18094505]

# Supplementary Material

## **DIRT: a high-throughput computing and collaboration platform for field-based root phenomics**

Abhiram Das<sup>1</sup>, Hannah Schneider<sup>2</sup>, James Burridge<sup>2</sup>, Ana Karine Martinez Ascanio<sup>3</sup>, Tobias Wojciechowski<sup>4</sup>, Christopher N. Topp<sup>5</sup>, Jonathan P. Lynch<sup>2</sup>, Joshua S. Weitz<sup>1,6</sup>, Alexander Bucksch<sup>1,7,\*</sup>

<sup>1</sup>School of Biology, Georgia Institute of Technology, Atlanta, Georgia, USA

<sup>2</sup>Department of Plant Science, Pennsylvania State University, Pennsylvania, USA

<sup>3</sup>School of Agriculture and Veterinary Medicine, University of Bologna, Italy

<sup>4</sup>Forschungszentrum Jülich IBG-2 Pflanzenwissenschaften, Germany

<sup>5</sup>Donald Danforth Plant Science Center, St. Louis, Missouri, USA

<sup>6</sup>School of Physics, Georgia Institute of Technology, Atlanta, Georgia, USA

<sup>7</sup>School of Interactive Computing, Georgia Institute of Technology, Atlanta, Georgia, USA

\*Corresponding author – Alexander Bucksch ([bucksch@gatech.edu](mailto:bucksch@gatech.edu))

# Contents

|          |                                                         |           |
|----------|---------------------------------------------------------|-----------|
| <b>1</b> | <b>DIRT Overview .....</b>                              | <b>4</b>  |
| <b>2</b> | <b>DIRT pipeline and its parameters.....</b>            | <b>4</b>  |
| <b>3</b> | <b>DIRT RSA traits.....</b>                             | <b>5</b>  |
| 3.1      | Common traits.....                                      | 5         |
| 3.2      | Dicot root traits.....                                  | 6         |
| 3.4      | Monocot root traits .....                               | 7         |
| 3.5      | Excised root traits.....                                | 8         |
| <b>4</b> | <b>Output file formats.....</b>                         | <b>8</b>  |
| <b>5</b> | <b>Public Data.....</b>                                 | <b>9</b>  |
| 5.1      | Image data sets and computations .....                  | 9         |
| <b>6</b> | <b>Quick start guide.....</b>                           | <b>10</b> |
| 6.1      | Access DIRT .....                                       | 10        |
| 6.2      | Login to DIRT .....                                     | 10        |
| 6.3      | Root image collection .....                             | 10        |
| 6.3.1    | <i>Create root image collection .....</i>               | <i>10</i> |
| 6.3.2    | <i>Upload images to a collection.....</i>               | <i>10</i> |
| 6.3.3    | <i>View root image collections.....</i>                 | <i>10</i> |
| 6.3.4    | <i>Share root image collection.....</i>                 | <i>10</i> |
| 6.3.5    | <i>Download images from a collection.....</i>           | <i>11</i> |
| 6.3.6    | <i>Download image metadata of a collection.....</i>     | <i>11</i> |
| 6.3.7    | <i>Add metadata of images in a collection.....</i>      | <i>12</i> |
| 6.4      | Marked image collection.....                            | 12        |
| 6.4.1    | <i>Create a marked collection .....</i>                 | <i>12</i> |
| 6.4.2    | <i>Add images to an existing marked collection.....</i> | <i>12</i> |
| 6.4.3    | <i>View marked collections.....</i>                     | <i>12</i> |
| 6.5      | Image Threshold Calibration .....                       | 13        |
| 6.5.1    | <i>Calibrate threshold value of an image .....</i>      | <i>13</i> |
| 6.5.2    | <i>View calibrations.....</i>                           | <i>13</i> |
| 6.6      | RSA Trait Computation.....                              | 13        |
| 6.6.1    | <i>Create a computation .....</i>                       | <i>13</i> |
| 6.6.2    | <i>View computations .....</i>                          | <i>14</i> |
| 6.6.3    | <i>Share a computation.....</i>                         | <i>14</i> |
| 6.6.4    | <i>Cancel a computation.....</i>                        | <i>15</i> |
| 6.6.5    | <i>Download computed RSA traits .....</i>               | <i>15</i> |
| 6.7      | User quota .....                                        | 15        |
| <b>7</b> | <b>Developer guide.....</b>                             | <b>16</b> |
| 7.1      | Architecture overview .....                             | 16        |
| 7.2      | Installation guide in proprietary environments.....     | 16        |
| 7.3      | Extending the existing pipeline.....                    | 17        |
| 7.4      | Configuration and deployment of DIRT .....              | 17        |
| 7.4.1    | <i>Configuration of Database server node.....</i>       | <i>17</i> |

|           |                                                       |           |
|-----------|-------------------------------------------------------|-----------|
| 7.4.2     | <i>Configuration of Web server node .....</i>         | 17        |
| 7.4.3     | <i>Configuration of Grid computing node .....</i>     | 17        |
| 7.4.4     | <i>Deployment of database .....</i>                   | 18        |
| 7.4.5     | <i>Deployment on Web server .....</i>                 | 18        |
| 7.4.6     | <i>Deployment on grid node .....</i>                  | 18        |
| 7.4.7     | <i>Configuration and administration of DIRT .....</i> | 19        |
| 7.5       | <i>Adding a new pipeline .....</i>                    | 21        |
| <b>8</b>  | <b>Limitations.....</b>                               | <b>22</b> |
| 8.1       | File type and size.....                               | 22        |
| 8.2       | Number of image files per upload.....                 | 22        |
| 8.3       | Number of images per computation .....                | 22        |
| 8.4       | Calibration of one image at a time .....              | 22        |
| <b>9</b>  | <b>Figures.....</b>                                   | <b>23</b> |
| 9.1       | Figure S1 .....                                       | 23        |
| 9.2       | Figure S2 .....                                       | 24        |
| 9.3       | Figure S3 .....                                       | 25        |
| 9.4       | Figure S4 .....                                       | 26        |
| 9.5       | Figure S5 .....                                       | 27        |
| 9.6       | Figure S6 .....                                       | 28        |
| 9.7       | Figure S7 .....                                       | 29        |
| 9.8       | Figure S8 .....                                       | 30        |
| 9.9       | Figure S9 .....                                       | 30        |
| 9.10      | Figure S10.....                                       | 31        |
| 9.11      | Figure S11.....                                       | 32        |
| 9.12      | Figure S12.....                                       | 32        |
| 9.13      | Figure S13.....                                       | 33        |
| 9.14      | Figure S14.....                                       | 33        |
| 9.15      | Figure S15.....                                       | 34        |
| 9.16      | Figure S16.....                                       | 35        |
| 9.17      | Figure S17.....                                       | 36        |
| 9.18      | Figure S18.....                                       | 37        |
| 9.19      | Figure S19.....                                       | 38        |
| 9.20      | Figure S20.....                                       | 39        |
| 9.21      | Figure S21.....                                       | 40        |
| 9.22      | Figure S22.....                                       | 41        |
| 9.23      | Figure S23.....                                       | 42        |
| 9.24      | Figure S24.....                                       | 43        |
| 9.25      | Figure S25.....                                       | 44        |
| 9.26      | Figure S26.....                                       | 45        |
| 9.27      | Figure S27.....                                       | 46        |
| 9.28      | Figure S28.....                                       | 46        |
| 9.29      | Figure S29.....                                       | 47        |
| <b>10</b> | <b>References .....</b>                               | <b>48</b> |

# 1 DIRT Overview

DIRT is an online web platform to compute root system architecture (RSA) traits from images taken with the DIRT imaging protocol[1]. DIRT facilitates the use of high-throughput computing platform by non-technical plant scientists to compute RSA traits via a set of intuitive web interfaces. DIRT is freely available on the iPlant cyber-infrastructure at <http://dirt.iplantcollaborative.org>.

## 2 DIRT pipeline and its parameters

The DIRT RSA trait computation pipeline ([Figure S1](#)) is developed in python and is configurable to run on any high-throughput grid computing environment. Its parameters (**Table S1**) are entered via the web interface. The DIRT imaging protocol defines all necessary and optional parameters[1]. [Figure S2](#) shows a sample image taken with the DIRT imaging protocol that contains a circular scale marker with known diameter, an experiment tag with a code, a root crown, and an excised root sample. Note that DIRT supports two different modes for extracting the information on the experiment tag. The first mode allows the extraction of a string via optical character recognition. The second mode allows the use of barcodes or QR codes. Both modes require that the tag is in focus and clearly readable. Failed or incorrect extractions have to be corrected manually.

**Table S1:** Input parameters to DIRT RSA trait computation pipeline.

| Name                    | Requirement | Description                                                                                                                                                                                                                                                                            |
|-------------------------|-------------|----------------------------------------------------------------------------------------------------------------------------------------------------------------------------------------------------------------------------------------------------------------------------------------|
| Masking Threshold       | Mandatory   | A real value that is used to segment the root structure from the image background.                                                                                                                                                                                                     |
| Scale Marker            | Mandatory   | The known scale marker diameter allows correction of camera tilting and transforming image coordinates into metric units. For example check the image in <a href="#">Figure S2</a> . A value of 0.0 indicates that no scale marker is present, but the traits will be shown in pixels. |
| Stem Reconstruction     | Optional    | Turns on an optional reconstruction of the stem. Maize genotypes occasionally have dark stem parts that have to be reconstructed because they cannot be differentiated from the dark background. We suggest careful use and visual inspection of this feature.                         |
| Require Segmentation    | Optional    | Whether segmentation of foreground and background is required for the image.                                                                                                                                                                                                           |
| Has Root Crown          | Optional    | Whether the root in the image has crown roots.                                                                                                                                                                                                                                         |
| Number of Excised Roots | Optional    | Number of excised roots present in the image. E.g. the image in <a href="#">Figure S2</a> has one excised root.                                                                                                                                                                        |

### 3 DIRT RSA traits

#### 3.1 Common traits

**Table S2:** Common RSA traits computed by DIRT pipeline. (\* annotates traits requested by the user community)

| Trait Name                                              | Trait Code     | Trait Description                                                                                                                                                                              |
|---------------------------------------------------------|----------------|------------------------------------------------------------------------------------------------------------------------------------------------------------------------------------------------|
| Stem Diameter                                           | DIA_STM        | Stem Diameter derived from the medial axis                                                                                                                                                     |
| Simple Stem Diameter*                                   | DIA_STM_SIMPLE | Simple Stem Diameter as calculated in Root Estimator for Shovelomics Traits (REST) from the ETH Zürich[2]                                                                                      |
| Projected Root Area*                                    | AREA           | Number of foreground pixels belonging to the root system. Previously defined in GiA Roots[3]                                                                                                   |
| Average Root Density                                    | AVG_DENSITY    | Ratio of foreground to background pixels with in the root shape                                                                                                                                |
| Median Tip Diameter                                     | TD_MED         | Median Tip Diameter estimated from the medial circle at the tips                                                                                                                               |
| Mean Tip Diameter                                       | TD_AVG         | Mean Tip Diameter estimated from the medial circle over all detected tips                                                                                                                      |
| Median width of root system                             | WIDTH_MED      | Median width of root system measured horizontally from the first to the last foreground pixel                                                                                                  |
| Maximum width of root system                            | WIDTH_MAX      | Maximum width of root system measured horizontally from the first to the last foreground pixel                                                                                                 |
| Accumulated width over 10%-90% percent depth (D-values) | D10-D90        | Percentage of width accumulation at 10%-90% depth                                                                                                                                              |
| Slope of the graph of D-values                          | DS10 – DS90    | Slope at the D10-D90 value that represents the rate of accumulation                                                                                                                            |
| Spatial Root Distribution X                             | RDISTR_X       | Spatial distribution of the root shape in x-axis. This is the x component of the vector pointing from the center of the bounding box of the root shape to the center of mass of the root shape |
| Spatial Root Distribution Y                             | RDISTR_Y       | Spatial distribution of the root shape in y-axis. This is the y component of the vector pointing from the center of the bounding box of the root shape to the center of mass of the root shape |
| Rooting depth skeleton*                                 | SKL_DEPTH      | Rooting depth calculated from the medial axis of the root system. Previously used in GiA Roots [3]                                                                                             |
| Skeleton Width*                                         | SKL_WIDTH      | Width calculated from the medial axis of                                                                                                                                                       |

|                                 |           |                                                                 |
|---------------------------------|-----------|-----------------------------------------------------------------|
|                                 |           | the root system. Previously used in GiA Roots[3]                |
| Number of Root Tip Paths (RTPs) | RTP_COUNT | Corresponds to the overall number of tips detected in the image |

### 3.2 Dicot root traits

**Table S3:** Dicot RSA traits computed by DIRT pipeline (\* annotates traits requested by the user community)

| Trait Name                        | Trait Code                                          | Trait Description                                                                                              |
|-----------------------------------|-----------------------------------------------------|----------------------------------------------------------------------------------------------------------------|
| Soil Tissue Angle Range (STA)     | STA_RANGE                                           | Range of STA angles present in the root                                                                        |
| First Dominant Soil Tissue Angle  | STA_DOM_I                                           | Average of the 1st significant peak bin in the histogram of calculated soil tissue angles                      |
| Second Dominant Soil Tissue Angle | STA_DOM_II                                          | Average of the 2nd significant peak bin in the histogram of calculated soil tissue angles                      |
| Soil Tissue Angle x% 1            | STA_25_I,<br>STA_50_I,<br>STA_75_I,<br>STA_90_I     | 1st dominant angle at 25%, 50%, 75%, 90% of the RTP length                                                     |
| Soil Tissue Angle x% 2            | STA_25_II,<br>STA_50_II,<br>STA_75_II,<br>STA_90_II | 2nd dominant angle at 25%, 50%, 75%, 90% of the RTP length                                                     |
| Dominant Root Tissue Angle 1      | RTA_DOM_I                                           | Average of the 1st significant peak in the histogram of calculated root tissue angles binned in 1 degree steps |
| Dominant Root Tissue Angle 2      | RTA_DOM_II                                          | Average of the 2nd significant peak in the histogram of calculated root tissue angles binned in 1 degree steps |
| Minimum Soil Tissue Angle         | STA_MIN                                             | Minimum Soil Tissue Angle measured over all RTPs                                                               |
| Maximum Soil Tissue Angle         | STA_MAX                                             | Maximum Soil Tissue Angle measured over all RTPs                                                               |
| Median Soil Tissue Angle          | STA_MED                                             | Median Soil Tissue Angle measured over all RTPs                                                                |
| Root Tissue Angle Range           | RTA_RANGE                                           | Range of RTA angles present in the root                                                                        |
| Minimum Root Tissue Angle         | RTA_MIN                                             | Minimum Root Tissue Angle measured over all RTPs                                                               |
| Maximum Root Tissue Angle         | RTA_MAX                                             | Maximum Root Tissue Angle measured over all RTPs                                                               |
| Median Root Tissue Angle          | RTA_MED                                             | Median Root Tissue Angle measured over all RTPs                                                                |
| Roots Seg 1*                      | NR_RTP_SEG_I                                        | Number of RTPs emerging from the Hypocotyl (Root seg 1)                                                        |

|                                           |                                                 |                                                                                                               |
|-------------------------------------------|-------------------------------------------------|---------------------------------------------------------------------------------------------------------------|
| Roots Seg 2*                              | NR_RTP_SEG_II                                   | Number of RTPs emerging from the taproot (Root seg 2)                                                         |
| Number of adventitious roots*             | ADVT_COUNT                                      | Number of adventitious roots estimated as RTP bundles emerging from root seg 1                                |
| Number of basal roots*                    | BASAL_COUNT                                     | Number of basal roots estimated as emerging RTP bundles from root seg 2                                       |
| Adventitious root angles*                 | ADVT_ANG                                        | Adventitious root angel estimated from the paths detected in the number of adventitious roots                 |
| Basal root angles*                        | BASAL_ANG                                       | Basal root angles estimated from the paths detected in the number of basal roots                              |
| Hypocotyl Diameter*                       | HYP_DIA                                         | Hypocotyl Diameter estimated over the detected hypocotyl region as the average of diameters of medial circles |
| Tap root Diameter*                        | TAP_DIA                                         | Tap root diameter estimated over the detected taproot region as the average of diameters of medial circles    |
| Maximum diameter at 90-100 percent depth  | MAX_DIA_90                                      | Maximum diameter found in the interval of 90-100 percent rooting depth                                        |
| 50 percent drop*                          | DROP_50                                         | Depth value were 50% of the RTPs emerged from the central path (hypocotyl+taproot)                            |
| Central path diameter at 25 percent depth | CP_DIA25,<br>CP_DIA50,<br>CP_DIA75,<br>CP_DIA90 | Approximation of the tap root diameter at 25%,50%,75%,90% of the rooting depth                                |

### 3.3 Monocot root traits

**Table S4:** Monocot RSA traits computed by DIRT pipeline (\* annotates traits requested by the user community)

| Trait Name         | Trait Code | Trait Description                                                                                                                        |
|--------------------|------------|------------------------------------------------------------------------------------------------------------------------------------------|
| Root Top Angle*    | ANG_TOP    | Root Top Angle measured between the Random Sample Consensus[4] (RANSAC) fit line at depth of the D10 value and the horizontal soil line. |
| Root Bottom Angle* | ANG_BTM    | Root Bottom Angle measured between the RANSAC fit line at depth of the D80 value and the horizontal soil line.                           |

### 3.4 Excised root traits

**Table S5:** Excised root RSA traits computed by DIRT pipeline (\* annotates traits requested by the user community)

| Trait Name                       | Trait Code    | Trait Description                                                                  |
|----------------------------------|---------------|------------------------------------------------------------------------------------|
| Average lateral root length      | NODAL_LEN     | Average length of lateral roots along the central path                             |
| Nodal root path length           | NODAL_AVG_DIA | Length of the central path along the excised root                                  |
| Lateral branching frequency      | LT_BRA_FRQ    | Lateral branching frequency                                                        |
| Mean nodal root diameter         | LT_AVG_LEN    | Mean nodal root diameter measured along the medial axis of the excised root sample |
| Lateral mean angle               | LT_AVG_ANG    | Mean angle of all lateral roots emerging from the excised root sample              |
| Lateral angular range            | LT_ANG_RANGE  | Range of angles of the lateral root sample                                         |
| Lateral minimum angle            | LT_MIN_ANG    | Minimal lateral angle present in all measurements of the excised root sample       |
| Lateral maximum angle            | LT_MAX_ANG    | Maximal lateral angle present in all measurements of the excised root sample       |
| Distance to first lateral        | LT_DIST_FIRST | Distance to first lateral along the medial axis of the excised root                |
| Median diameter of lateral roots | LT_MED_DIA    | Median diameter of lateral roots estimated from the medial axis                    |
| Mean diameter of lateral roots   | LT_AVG_DIA    | Mean diameter of lateral roots                                                     |

## 4 Output file formats

Computed RSA trait values can be downloaded in two different file formats. Results can be downloaded either as a Microsoft Excel compatible CSV format or the newly developed RSML[5] format for root architecture. Of note, one CSV file is created per computation containing all computed traits of all images, whereas RSML files are created per image. Examples of the two file types containing the computed RSA traits can be downloaded following the links below.

[Example CSV file](#)

[Example RSML file](#)

## 5 Public Data

### 5.1 Image data sets and computations

The iPlant installation of DIRT contains previously published data sets and computations as well as newly contributed data sets. Note, that new traits, features and changes in libraries during the development process might induce smaller numerical inaccuracies in the computations compared to the original versions.

**Table S6:** Data sets publicly available on DIRT

| Name                                   | Previously used in publications | Number of Images | Description                                                                                                                                                                                               |
|----------------------------------------|---------------------------------|------------------|-----------------------------------------------------------------------------------------------------------------------------------------------------------------------------------------------------------|
| Cowpea Diversity SouthAfrica 2013      | [1]                             | 1500             | Cowpea Diversity panel collected by James Burridge at URBC, South Africa, 2013                                                                                                                            |
| Maize Wisconsin Diversity Panel        | [1]                             | 85               | Subset of the Wisconsin Diversity Panel collected by Eric Nord, Penn State University and Scott Stelpflug, University of Wisconsin-Madison at URBC, South Africa 2013. (Images taken by Tsi'tso Mokoena). |
| Technical Error Set Maize              | [1]                             | 50               | Test set to determine the technical errors in imaging. The maize roots were placed with a supporting structure on the board to minimize placing errors.                                                   |
| Technical Error Set Bean               | [1]                             | 50               | Test set to determine the technical error in imaging. The bean roots were placed without supporting structures on the board.                                                                              |
| Rice grown in gellan gum               | [1, 3, 6, 7]                    | 2406             | Data produced and used by Iyer-Pascuzzi et. al                                                                                                                                                            |
| Maize Validation Set                   | Unpublished                     | 99               | Maize validation data set collected in Ukulima at the Ukulima Root Biology Center, South Africa 2014.                                                                                                     |
| Barley Diversity Panel                 | Unpublished                     | 52               | Barley Diversity Panel (192 accessions)                                                                                                                                                                   |
| German and Australian barley varieties | [8]                             | 64               | A comparison study of root system of German and Australian barley varieties. The plants were grown in a semi-hydroponic phenotyping system (Ying L. Chen et al., 2011)                                    |
| Tomato NILs                            | Unpublished                     | 568              | Solanum lycopersicum x pennellii introgression lines collected summer 2014 from Bradford Research station Columbia, Missouri                                                                              |
| Maize Cadriano                         | Unpublished                     | 20               | F4 families of maize                                                                                                                                                                                      |

## 6 Quick start guide

### 6.1 Access DIRT

The public DIRT installation on the iPlant cyberinfrastructure is accessible at <http://dirt.iplantcollaborative.org>. The link accesses the DIRT home page (Figure S3).

### 6.2 Login to DIRT

Click on the ‘**Login**’ link on the home page (as shown in Figure S3) to log into DIRT. DIRT uses iPlant’s Central Authentication Service (CAS) to authenticate its users. Therefore, it’s available to all iPlant’s registered users. By clicking on the ‘Log in’ button (Figure S4), will direct the user to the iPlant authentication services interface. Alternatively, using the ‘**Cancel iPlant Login**’ link (as shown in Figure S4) will direct the user to the DIRT authentication services interface. The iPlant authentication interface also provides link to sign up for an iPlant account.

### 6.3 Root image collection

A root image collection (aka **collection**) is a container that holds a set of root images belonging to an experiment and its metadata. Each root image in the collection can also be tagged with its own metadata. All functionalities (mentioned in following subsections i.e. 6.3.1, 6.3.2, etc.) associated to root image collection(s) are available to a logged in user via ‘**ROOTS**’ menu and its sub-menu. An anonymous user can only view publicly available collections, its metadata and associated root images.

#### 6.3.1 Create root image collection

A user first creates a root image collection, in order to store and manage root images. To create a root image collection, select ‘**CREATE ROOT COLLECTION**’ sub-menu as shown in Figure S5 and fill in values for the mandatory metadata fields. On successful submission of this form, the user will be navigated to the image upload screen as described in the next section.

#### 6.3.2 Upload images to a collection

On creation of a new root image collection the user is navigated to the image upload interface shown in Figure S6. A maximum of 200 image files of type png, gif, jpg and jpeg can be uploaded at once. This restriction is in account of the limitations of browser’s support for the http POST data transfer protocol. Steps to upload images are:

1. Click on ‘**Add files**’ link on this interface to add images from your local computer
2. Click on ‘**Start upload**’
3. Enter values for the mandatory fields (i.e. with **\***) and optional fields as applicable
4. Scroll down and click on ‘Add to collection’ button (not seen in Figure S6).

While images are being added to the collection by a background process, the user is navigated to the root image collection’s view interface with a message i.e. ‘*# uploaded images are being added to this collection*’. The collection’s view interface can be refreshed manually to see the recently added images or can be visited at a later time.

#### 6.3.3 View root image collections

All collections managed by a user are accessible by visiting the ‘**ROOTS**’ menu and then clicking on the ‘**My**’ tab (Figure S7).

#### 6.3.4 Share root image collection

Root image collections managed by a user can be shared publicly or privately with collaborators.

#### 6.3.4.1 Share a collection with public

Root image collections are by default private i.e. accessible only by the owner or manager. To mark a root image collection public:

1. Click on the '**ROOTS**' menu item
2. Select the collection from the '**My**' tab ([Figure S7](#))
3. Click on the 'Edit' tab ([Figure S8](#))
4. Scroll down and expand the 'Collections settings' section
5. Choose public under collection visibility section and click save

Public collections are visible to all the visitors of the site including non-registered or anonymous users.

#### 6.3.4.2 Share the collection with collaborators

To share a root image collection privately with collaborators (i.e. other registered users of DIRT)

1. Select a collection from the '**My**' tab by visiting the '**ROOTS**' menu
2. From root image collections view page click on the 'Group' tab ([Figure S9](#))
3. Click on the 'Add people' link.

The 'Add people' link will bring up an interface to search for a user and add the user to the collection. To manage membership of the existing users, click on the 'People' link as shown in [Figure S9](#). User name of all registered users can be accessed by visiting the 'ABOUT' menu.

#### 6.3.5 Download images from a collection

A registered user can download root images from a public collection or from a collection he/she is a member of. To download images:

1. Select a collection from the '**Public**'/'**My**' tab by visiting the '**ROOTS**' menu
2. Selecting a collection will bring up the collection view page ([Figure S10](#))
3. Select images of choice and click on the '**Download Images**' button ([Figure S10](#))
4. Selected images will be downloaded as a 'ZIP' file. Based on the user's browser settings it will either open up an window asking user to save the zip file or it will save the zip file to the download directory.

#### 6.3.6 Download image metadata of a collection

Metadata associated with images of a collection can be downloaded from the collection view interface ([Figure S10](#)). The metadata of the selected images will be downloaded in CSV file format. The following lines shows contents of a sample metadata CSV file that can be edited via an ASCII text editor such as Notepad or Microsoft Excel.

```
Image ID, Image Name, Genus, Species, Family, Dry Biomass, Fresh Biomass, SPAD, Age, Resolution(pixels/mm)
17951,DSC_0042.JPG,Vigna,unguiculata,Fabaceae,0,0,0,0,0
17952,DSC_0043.JPG,Vigna,unguiculata,Fabaceae,0,0,0,0,0
```

First line of the CSV file represents the field labels and subsequent lines represent the metadata values of the images. This file can also be used to '**Add metadata**' to the images of a collection.

To download metadata of images of a collection:

1. Select a collection from the '**Public**'/'**My**' tab by visiting the '**ROOTS**' menu
2. Selecting a collection will bring up the collection view page ([Figure S10](#))
3. Select images of choice and click on the '**Download Metadata**' button ([Figure S10](#))

### 6.3.7 Add metadata of images in a collection

Each image in DIRT has its own metadata. Image metadata can be added either by editing each image or in batch by uploading a CSV file per collection containing metadata information about each image. To add/update/edit metadata of each image:

1. Go the collection view page as shown in [Figure S10](#)
2. Select an image by clicking on the link shown below the image
3. On image view page click on the 'Edit' tab to add/update its metadata

Metadata batch upload for multiple images of a collection:

1. Download metadata file of the selected images or all images in a collection (see section **6.3.6**)
2. Edit and update the downloaded CSV file with appropriate metadata values. Optionally, you can add additional key names at the end of the header and fill in the corresponding values.
3. Click on the 'Add Metadata' on the collection view interface ([Figure S10](#))
4. It will bring up the metadata upload interface as shown in [Figure S11](#)
5. Enter a title, select the updated metadata CSV file by clicking on the 'Browse' button and then click on 'Upload' and finally click 'Save'.

## 6.4 Marked image collection

Marked image collection (aka **Marked Collection**) is a functionality that allows users to create virtual image collection by mixing images from different physical root image collections. This is also a required functionality for the calibration (defined in **Section 6.5** of the Supplementary Information) and RSA trait computation (defined in **Section 6.6** of the Supplementary Information). The marked collection functionality is only privately available to a registered user. A user can access all of his/her marked collections by visiting the '**MARKED COLLECTIONS**' menu as shown in [Figure S14](#). Marked collection functionality is also available on the collections view page as shown in [Figure S10](#), where a user can add selected images to a new or existing marked collection.

### 6.4.1 Create a marked collection

To create a new marked collection:

1. Go to the collection view page by selecting a collection from your list ([Figure S7](#))
2. Select (all or some) images from the collection view page ([Figure S10](#))
3. Click on 'Add to Marked Collection' button
4. The click will open the marked collection interface as shown in [Figure S12](#), select option 'No' and enter a name for the new marked collection and click on the 'Next' button.

### 6.4.2 Add images to an existing marked collection

To add images to an existing marked collection, follow the same procedure as mentioned in **Section 6.4.1** of the Supplementary Information, in step 4 instead on selecting option 'No', select 'Yes' as shown in [Figure S13](#) and then choose a marked collection from the select list. If the select list has zero items, change your option to 'No' to create a new marked collection.

### 6.4.3 View marked collections

To view the list of available marked collections, click on the '**MARKED COLLECTIONS**' menu item as show in [Figure S14](#). The user can delete an existing marked collection by selecting a collection from the list and clicking on the 'Delete Marked Collections' button.

## 6.5 Image Threshold Calibration

The RSA trait computation pipeline available on DIRT, requires the user to provide segmentation threshold value as a parameter. A user can determine the threshold value by using image threshold calibration (aka **Calibration**) functionality. Calibration enables DIRT users to visually inspect calculated masks of a selected root image for a set of threshold values of 1, 3, 5, 10, 15 and 20. Hence, users without technical background can choose appropriate threshold values for the computation. A user can access this functionality by clicking on the ‘**CALIBRATIONS**’ menu and its sub-menu ‘**CALIBRATE**’. DIRT enables calibration of one image at a time. If a user wants to calibrate the thresholds for multiple images, he/she has to calibrate several images individually and compare their results visually. The calibration functionality can also be accessed from the ‘Create Computation’ interface (defined in Section 6.6.1 of the Supplementary Information).

### 6.5.1 Calibrate threshold value of an image

To calibrate an image, click on the ‘**CALIBRATE**’ sub-menu as shown in [Figure S15](#).

It works in two steps:

1. Select a marked collection whose image needs calibration and click ‘Go’ as shown in [Figure S15](#).
2. Choose an image and click on ‘Calibrate Threshold’. Depending on the image resolution this process may take several minutes (may be more than 15 minutes). During this computation the user will see the interface as shown in [Figure S16](#). Do not close the browser window while it computes. Moving the focus away from the browser, won’t show the message as seen in [Figure S16](#), but the computation is still running for the selected image and the page will refresh with masked images after its completion. Closing the browser window will terminate the computation.

On completion of the calibration, the user will be presented with binary masked images and their corresponding threshold values ([Figure S17](#)). The user can select the appropriate masked image and navigated to the ‘Create computation’ page with corresponding threshold value.

### 6.5.2 View calibrations

A user can access all past calibrations ([Figure S18](#)) by clicking on the ‘**CALIBRATIONS**’ menu. The calibration list interface also allows the user to delete a past calibration. To delete a calibration, select the appropriate row and click on the ‘Delete Calibrated Images’ button.

## 6.6 RSA Trait Computation

RSA trait computation (aka **Computation**) enables the user to compute the whole or sub-set of traits defined in Section 3 of the Supplementary Information, for all the images in a marked collection. A user can access this functionality by clicking on the ‘**COMPUTATIONS**’ menu and its ‘**CREATE COMPUTATION**’ sub-menu.

### 6.6.1 Create a computation

The create computation interface enables the user to transfer the images of a marked collection to the high-throughput computing system and run the DIRT RSA trait computation pipeline on the images of the marked collection. DIRT on the iPlant cyber infrastructure submits images to TACC’s stampede environment (<https://www.tacc.utexas.edu/systems/stampede>) to compute multiple images at once. In order to initiate the transfer, a user has to navigate to the create computation interface. This interface is accessible as the ‘**CREATE COMPUTATION**’ item in the ‘**COMPUTATIONS**’ menu (see [Figure S19](#)). For detailed description about the pipeline

parameters, we refer to [Section S2](#) of the Supplementary Information. For an appropriate masking threshold value the user can access the calibration functionality, from this interface by clicking on the ‘**Calibrate**’ link as shown in [Figure S19](#). By default all RSA traits are marked for computation. The user can change this setting by expanding the appropriate sections (i.e. Common Traits, Dicot Root Traits, etc. as shown in [Figure S19](#)) and then checking and unchecking the required traits. On successful submission the user will be navigated to computations list page with a message i.e. ‘*Submitting jobs to the grid! Computation <name> has been created*’. Note, that also images can be computed with no scale marker (e.g. Barley Diversity panel). However, the output will be in pixels.

### **6.6.2 View computations**

A user can view his/her computations by clicking on the ‘COMPUTATIONS’ menu and then selecting ‘My’ tab interface as shown in [Figure S20](#).

### **6.6.3 Share a computation**

Similar to a collection, a computation can be shared publicly with all or privately with trusted collaborators.

#### **6.6.3.1 Share with public**

Similar to root image collections, computations are marked private by default. The owner of the computation can declare it public by editing the computation as shown in [Figure S21](#) and changing its ‘Computation Settings’ to public. To mark a computation public:

1. Click on the ‘COMPUTATIONS’ menu item
2. Select the computation from the ‘My’ tab ([Figure S20](#))
3. Click on the ‘Edit’ tab ([Figure S21](#))
4. Scroll down and expand the ‘Computation settings’ section
5. Choose public under collection visibility section and click save

Public computations are visible to all the visitors of the site including non-registered or anonymous users.

### 6.6.3.2 Share privately with collaborators

To share a computation privately with collaborators (i.e. other registered users of DIRT):

1. Select a computation from the 'My' tab by visiting the 'COMPUTATIONS' menu ([Figure S20](#))
2. From computations view page ([Figure S23](#)) click on the 'Group' tab
3. Click on the 'Add people' link.

Add people link will bring up an interface to search for a user and add the user to the computation. To manage membership of the existing users, click on the 'People' link.

### 6.6.4 Cancel a computation

A user can cancel a submitted or running computation anytime during its execution. To cancel a running computation,

1. Go to the computations list page by clicking on the 'COMPUTATIONS' menu ([Figure S20](#))
2. Select a computation whose status is either 'Submitted' or 'Running'
3. On the computations view page as shown in [Figure S22](#) click on the 'Cancel' button.

### 6.6.5 Download computed RSA traits

#### 6.6.5.1 Download computed traits of whole computation

After a computation has completed successfully, the computed traits are available for download in the form of a CSV file. To check the contents of a sample CSV file refer we refer to [Section S6](#). The CSV file and image metadata file are available for download on the computation's view page as shown in [Figure S23](#).

#### 6.6.5.2 Download computed traits for one image of a computation

Besides a CSV file containing the computed traits for the whole computation, each image is additionally associated with a RSML[5] file. To check a sample RSML file, we refer to [Section S6](#). To access the RSML file:

1. Select one by clicking on the link present under the masked image on the computation view interface ([Figure S23](#))
2. It will navigate to the individual image's computation view page containing link to the RSML file ([Figure S24](#))

### 6.7 User quota

DIRT allocates a configurable storage and file transfer quota to its users. Each DIRT user on iPlant, has a total storage limit of 100 GB and daily computation (i.e. file transfer/image processed) limit of 10 GB. The user can access this information by visiting the user profile page (as shown in [Figure S25](#)) by clicking on the user name at top right corner. If more iPlant resources become available to DIRT, the limit will be increased.

## 7 Developer guide

### 7.1 Architecture overview

DIRT is a multi-tiered integrated online platform developed using the Drupal framework[9]. DIRT a three tier platform; (1) **client** tier represent the web browser user interface,(2) **processing** tier represents the Drupal[9] modules and the image processing pipeline, and (3) **storage** tier represents the database and file systems.

### 7.2 Installation guide in proprietary environments

DIRT is an open source platform developed on the open source content management system Drupal. Hence, DIRT can be installed on any proprietary environment and be extended to meet specific user requirements. For system requirements and installation instructions, we refer to Drupal's online documentation available at <https://www.drupal.org/documentation/install>.

In order to install DIRT on your local environment, two prerequisites have to be installed and configured as described below:

1. *Web server:* To configure the web server follow the Drupal installation document mentioned in the previous paragraph. Once you have a Drupal instance running, download the DIRT source from [http://dirt.iplantcollaborative.org/sites/default/dirt\\_files/dirt-src.tar](http://dirt.iplantcollaborative.org/sites/default/dirt_files/dirt-src.tar) and extract it to your system. This archive file contains the 'dirt.sql' file and 'public\_html' directory. Load the 'dirt.sql' to your local database instance and copy the contents of the public\_html to your local web root directory. Make sure that the 'settings.php' file is updated with correct database credentials to connect to your local database.
2. *DIRT pipeline:* Download DIRT pipeline from <https://github.com/abucksch/DIRT> and install and configure required software stack on both the web server and the grid computing platform.
3. *Install and configure interface scripts:* Log in to your local DIRT site as the administrator and go to 'DIRT Server Configuration' interface under 'Configuration' menu as shown in [Figure S26](#). Enter your grid server and web server details and save. Similarly access 'DIRT Quota Configuration' interface ([Figure S27](#)) and enter the daily quota limit and save. Log in to your grid computing environment and download and extract this file [http://dirt.iplantcollaborative.org/sites/default/dirt\\_files/dirt-server-scripts.tar](http://dirt.iplantcollaborative.org/sites/default/dirt_files/dirt-server-scripts.tar). On extraction this file will create a directory called 'src'. Make sure that 'src' directory is directly under the server home directory as configured using the 'DIRT Server Configuration' page. The 'src' directory contains two sub-directories called 'python' and 'scripts'. Update 'dirt\_job.slurm' and 'submit\_dirt\_jobs.sh' scripts in 'scripts' directory as per your local grid computing environment and scheduler. Log in to your web server system, go to the web server's script directory as configured on the 'DIRT Server Configuration' page and download and extract this [http://dirt.iplantcollaborative.org/sites/default/dirt\\_files/dirt-web-scripts.tar](http://dirt.iplantcollaborative.org/sites/default/dirt_files/dirt-web-scripts.tar) file.

### 7.3 Extending the existing pipeline

Existing DIRT image processing pipeline can be extended to compute new RSA traits. To extend the pipeline take following steps:

1. Download the python source code from <https://github.com/abucksch/DIRT> and make necessary changes to your need.
2. Log in to Drupal as an administrator and update the existing content called 'DIRT\_Py' to reflect the new traits.
3. Log in to Drupal as an administrator and add new fields corresponding to the new traits to Drupal content types 'Computation' and 'DIRT Output'.
4. Update the DIRT Drupal modules 'dirt\_run\_computation' and 'dirt\_job\_status' to handle new traits.

### 7.4 Configuration and deployment of DIRT

#### 7.4.1 Configuration of Database server node

The MySQL database has to be installed and a database must be created for DIRT. We recommend that one follow the MySQL and Drupal installation instructions/guide to configure database.

#### 7.4.2 Configuration of Web server node

The node hosting web server is configured with PHP, Apache and Python to run Drupal and trait computation pipeline. Besides all PHP libraries (i.e. bz2, gmp, zlib, gd, libjpeg, libtiff, libpng3, libxml, t1lib5, libmcrypt, libmhash, wget, bzip2, ming, pdflib, php-bcmath, date, dba, dom, json, ssh, scp, mysql etc.). File\_Archive libraries are also mandatory to be installed. After the PHP installation, the following configuration are suggested to be updated in php.ini file:

- max\_execution\_time=120
- memory\_limit=512M
- post\_max\_size=1024M
- upload\_max\_filesize = 10242M
- max\_file\_uploads = 20

After installation of Python and dependent modules (see source code for dependencies) read access to all libraries has to be given on the file system level to all the system users.

The directory structure, as shown in Figure S28, is created to organize and store the contents of DIRT modules. Write permission must be granted on the 'temp' directory. The 'logs' directory will be used to enable web server access and store error log files. The 'public\_html' directory will be used to administrate all web server contents including all Drupal contents. The 'calibrate' directory under 'scripts' contains the trait computation scripts. The 'job\_status' directory contains the shell scripts to process trait computation outputs. The Apache web server is configured with a virtual host to serve content from the 'public\_html' directory and write log to the 'logs' directory.

#### 7.4.3 Configuration of Grid computing node

DIRT computes RSA traits in high-throughput fashion. TACC's STAMPEDE environment was configured with the required Python libraries to run the DIRT pipeline (see DIRT source code for dependencies). The directory structure as shown in Figure S29 must be created on the grid node to house python and shell scripts. The 'data' and 'out' directory under \$WORK (working

directory) provides storage for the original image data and output data from the pipeline during and after trait computation.

#### 7.4.4 Deployment of database

For the iPlant DIRT installation, the database is seeded and populated during configuration and module installation. The same procedure can be used by folks wishing to install, setup and instance DIRT on their local/private proprietary environment. To deploy the database; (a) download the DIRT source archive from the DIRT website at [http://dirt.iplantcollaborative.org/sites/default/dirt\\_files/dirt-src.tar](http://dirt.iplantcollaborative.org/sites/default/dirt_files/dirt-src.tar) to the database server node, (b) extract the archive and (c) load the dirt.sql file to the database created earlier.

#### 7.4.5 Deployment on Web server

For the iPlant DIRT installation, the web server components were developed de novo as part of configuration process. In order to install, setup and instance DIRT on a local/private proprietary environment: (a) download the DIRT source archive from the DIRT website at [http://dirt.iplantcollaborative.org/sites/default/dirt\\_files/dirt-src.tar](http://dirt.iplantcollaborative.org/sites/default/dirt_files/dirt-src.tar) to the web server node, (b) extract the archive to the 'public\_html' directory created earlier and (c) edit the 'settings.php' file under 'public\_html/sites/default' directory and update the database configuration setting parameter appropriate to your installation.

Download and extract the web server scripts from the site at [http://dirt.iplantcollaborative.org/sites/default/dirt\\_files/dirt-web-scripts.tar](http://dirt.iplantcollaborative.org/sites/default/dirt_files/dirt-web-scripts.tar) to the 'scripts' directory created earlier. Make sure that these scripts have execution rights and 'calibrate' directory contains python scripts and 'job\_status' directory contains following shell scripts:

- dirt\_clean.sh
- dirt\_extract.sh
- dirt\_read\_log.sh

DIRT web server schedule the 'dirt\_job\_status' rules modules via cron to run in every 10 minutes to check the status of the active computations on the grid. The web server administrator should setup a cron job on the web server to trigger every 10 minutes with the following command:

```
10 * * * * /usr/bin/wget -O - -q -t 1 http://<DomainURL>/cron.php?cron_key=<CronKey>
```

Make sure to change the *DomainURL* and *CronKey*.

#### 7.4.6 Deployment on grid node

Extract the archive file [http://dirt.iplantcollaborative.org/sites/default/dirt\\_files/dirt-server-scripts.tar](http://dirt.iplantcollaborative.org/sites/default/dirt_files/dirt-server-scripts.tar) to the grid node's home directory. It will create and copy the files to appropriate directories (see configuration section). Make sure that the 'src/python/1.1' directory contains the python scripts and 'src/scripts' directory contains following shell scripts:

- cancel\_jobs.sh
- clean\_output.sh
- prepare\_data.sh
- check\_job\_status.sh
- dirt\_job.slurm
- prepare\_output.sh
- clean\_all.sh
- submit\_dirt\_jobs.sh

Modify these scripts to meet your grid job scheduler's commands.

### 7.4.7 Configuration and administration of DIRT

After the successful configuration and deployment the modules on respective nodes, start your database and Apache server. Access your instance's URL (i.e. Apache virtual hosts name) in a browser and login with your administrator credentials. If you have setup the instance from the existing DIRT source, all the required modules, contents, rules, workflows, themes, views, etc. should have already been enabled for you. Although everything is preconfigured, we briefly describe in this section all custom DIRT modules and some important community contributed modules whose source code was updated to meet DIRT specifications. We recommend administrators to familiarize themselves with all the enabled Drupal modules in DIRT.

#### 7.4.7.1 DIRT theme

The DIRT platform has adopted and used a Drupal community contributed module called 'Danland' to theme its user interfaces. Detail information about this module can be found on the Drupal website at <https://www.drupal.org/project/danland>. We have tweaked its source code and customized it to provide the current user interfaces. This module can be administered from the DIRT's 'Appearance' administration menu. This module resides on the web server node under 'public\_html/sites/all/themes/danland/' directory. Its CSS and page template files have been modified to achieve the current look and feel. We have also added a custom JavaScript file called 'jquery.dirt.js' to alter validation on computation form. Therefore, this module should not be auto updated to new version by the webmaster or the administrator.

#### 7.4.7.2 DIRT content model

After the basic core setup, the content model for the DIRT platform must be defined and configured to handle system requirement specifications. In Drupal terms, the 'Content Types' (analogous to a class in object oriented concept) must be defined. The DIRT content model depends on many Drupal modules (like *Entity*, *Entity Reference*, *Organic Groups*, etc.). These modules must be deployed and configured before defining new custom content types. All these modules reside on the web server node at 'public\_html/sites/all/modules' directory and they can be accessed via administrative 'Modules' menu item. All custom DIRT content types can be accessed and managed via administrative 'Structure > Content Types' menu item.

#### 7.4.7.3 Batch upload of root images to a collection

To enable batch upload of images to a collection DIRT has used and adopted a community contributed module called 'bulk\_media\_upload'. Detail information about this module can be found on the Drupal's website. This module resides on the web server node under 'public\_html/sites/all/modules/bulk\_media\_upload' directory. The source code of this module has been modified to meet DIRT specifications. This module should not be auto upgraded. This module can be configured by the administrator by visiting the 'Media/Bulk Media Upload Settings' page under 'Configurations' menu.

#### 7.4.7.4 DIRT grid server configuration

This is a custom DIRT administration module that resides on the web server node at 'public\_html/sites/all/modules/dirt\_server\_conf' directory. This enables to store grid computing server details and web server location details to be used by other modules like grid job submission module across the system. Other modules of the platform depend on this administration module. Hence dependent modules cannot be deployed and/or enabled without the administration module. The administrator should first configure and save server configuration details by accessing the 'Configuration > DIRT Server Configuration' menu item.

#### **7.4.7.5 DIRT user quota configuration**

Similar to the previous module, it is also a custom DIRT administration module that resides on the web server node at 'public\_html/sites/all/modules/dirt\_transfer\_quota' directory. As the name suggests, it allows storing and parameterizing the daily file transfer quota for a user from web server node to the grid computing node. It can be accessed by the administrator via 'Configuration > DIRT Quota Configuration' menu item. Besides daily transfer quota DIRT also has option to configure total file storage quota for a user. This quota can be set per each user role by visiting the 'People > Disk Quota' administration menu item.

#### **7.4.7.6 DIRT grid job submission**

This is a custom DIRT rules module that depends on 'dirt\_server\_conf' and 'rules' module to handle RSA trait estimation and computation on the configured grid node as an asynchronous process. This module is available on the web server node at 'public\_html/sites/all/modules/dirt\_run\_computation' directory. This module is used to define a DIRT workflow rule, that is triggered on creation or save of a new content of type 'Computation'. On start of the workflow rule, this module starts a background process, that reads details from the computation object, prepares and archive of the image data along with pipeline parameters and selected traits, estimates the average grid computation wall time and processor requirements based on the image size and count, receives a secure connection with the grid node, transfers the content to grid node, executes scripts on grid node to extract and prepare the data for computation and executes scheduler job submission script, wait for it to be submitted, gets the grid job identifier, updates the database and notifies the user. These workflow rules can be accessed and configured by visiting the 'Configuration > Workflow > Rules' administrative menu item.

#### **7.4.7.7 DIRT grid job status check**

Similar to the previous module, it is also a custom DIRT rules module that depends on 'dirt\_server\_conf' and 'rules' module. This module is responsible for tracking a grid job and transferring the generated output from the grid node to the web server node, updating the database and notifying the user on job status. This workflow rule is also triggered on creation of a new content of type 'Computation'. Unlike the previous module, it is configured and scheduled to run every 10 minutes, until the grid job completion. This module uses the scripts on web server nodes and grid server nodes to perform its tasks. This module resides on the web server node at 'public\_html/sites/all/modules/dirt\_job\_status' directory. Similar to the previous module it can be accessed and configured via 'Rules' administrative menu item.

#### **7.4.7.8 DIRT calibrate threshold**

This is a custom DIRT module that enables image threshold calibration. It depends on 'dirt\_server\_conf' and 'views\_bulk\_operation' (a community contributed module). It resides on the web server node at 'public\_html/sites/all/modules/dirt\_threshold\_vbo' directory and uses RSA trait estimation pipeline components on the web server node.

#### **7.4.7.9 DIRT marked collection**

This module is responsible for creating/adding images to a 'Marked Collection' from a 'Collection'. It resides on the web server node at 'public\_html/sites/all/modules/dirt\_vc\_vbo' directory and depends on 'views\_bulk\_operation' module.

#### **7.4.7.10 DIRT metadata upload and download**

Metadata upload to a 'Collection' and download from a 'Collection' is handled by two different modules called 'dirt\_process\_metadata' and 'dirt\_metadatadl\_vbo' respectively. Both these modules reside on the web server node. Metadata upload module is a rules module that resides at 'public\_html/sites/all/modules/dirt\_process\_metadata' directory and depends on 'rules' and 'background\_process' community contributed module. This module is triggered on upload of a metadata file to a collection. The metadata download module resides at 'public\_html/sites/all/modules/dirt\_metadatadl\_vbo' directory and depends on 'views\_bulk\_operation' module.

#### **7.4.7.11 DIRT grid job cancellation**

This module is responsible for cancelling a submitted or a running job on the grid environment. It resides on the web server node at 'public\_html/sites/all/modules/dirt\_cancel\_job' directory and depends on 'dirt\_server\_conf' module.

#### **7.4.7.12 DIRT bulk image download**

Like the metadata download module, this is a custom DIRT module responsible for downloading images as an archive (zip) file from the 'Collection'. It depends on 'views\_bulk\_operation' module and resides at 'public\_html/sites/all/modules/dirt\_download\_image\_vbo' directory on the web server node.

### **7.5 Adding a new pipeline**

The DIRT platform design allows to add new RSA trait computation pipeline for existing traits or new traits. In addition to tasks performed in the user interface, adding a new pipeline requires some updates (including source code update) to the following nodes of DIRT platform:

1. Grid node
  - The new pipeline must be manually installed and configured on the grid computing environment.
  - New scheduler specific job submission scripts must be created to handle its parameters.
2. Web server node
  - A new content of type 'Image Processing Pipeline' must be added via the administrative 'Content > Add content > Image Processing Pipeline' menu item.
  - If the new pipeline introduces traits, these traits must be added to the 'Computation' and 'DIRT Output' content types.
  - If the pipeline requires any specific parameters, those fields must be added to the 'Computation' content type.
  - User interface validation scripts must be added to 'Computation' forms to show parameter fields with respect to a pipeline.
  - The 'dirt\_run\_computation' and 'dirt\_job\_status' modules must be updated to handle new pipeline, traits and pipeline parameter fields.

If the pipeline generates output in any proprietary format, 'dirt\_job\_status' module needs to be updated accordingly to process the pipeline output file types.

## **8 Limitations**

Even though DIRT is a high-throughput online scalable platform, it has technological constraints. The iPlant installation and the easy web access to high-throughput computing system restrict data upload and computation time. Furthermore the current algorithm restricts RSA trait computation to images taken according to DIRT imaging protocol [1]. In the following subsections we describe the limitations of the publicly available iPlant installation of DIRT. DIRT on iPlant installation can be accessed via any web browser; however it has been tested on Google Chrome (Version 43), Firefox (Version 38), Internet Explorer (Version 11) and Safari (Version 8). The web browser's privacy has to be set to accept third-party cookies and allow the site to run JavaScript.

### **8.1 File type and size**

The iPlant installation of DIRT exclusively accepts image files of types png, gif, jpg and jpeg. While no restrictions are imposed on the image resolution, single image file is not allowed to exceed 1 GB.

### **8.2 Number of image files per upload**

The batch upload to a root image collection is limited to 200 images at a time. As explained earlier in Section 6.3.2 of the Supplementary Information, this restriction gives end-users easy and quick web experience, while taking into account the limitations of http POST protocol, browser support and internet speed.

### **8.3 Number of images per computation**

The RSA trait computation pipeline runs on STAMPEDE [10] environment at TACC. Stampede limits wall-clock time of productions queue's to 48 hrs and the processor number to 4000. The priority of allocated resource for a computation is decided by the underlying Simple Linux Utility for Resource Management (SLURM) batch environment. Therefore, jobs requesting more resources may have to wait longer for resource allocation. DIRT estimates appropriate wall-clock time and processor needs for each submitted computation based on the image size and number. Currently, DIRT does not have a limit on the number of images that can be submitted per computation, but we recommend our users not to submit a computation of marked collection with more than 4000 images.

### **8.4 Calibration of one image at a time**

The calibration functionality of DIRT is a synchronous process that computes mask images for six different threshold values per image simultaneously and uses web server memory. Depending upon the image size this process takes from seconds to couple of minutes to finish. Therefore, as of this release DIRT only allows the calibration of one image at a time. Users wanting to calibrate multiple images of a marked collection have to bear with this limitation. However, it is possible to calibrate multiple images (one at a time) and visually explore the threshold values.

## 9 Figures

### 9.1 Figure S1

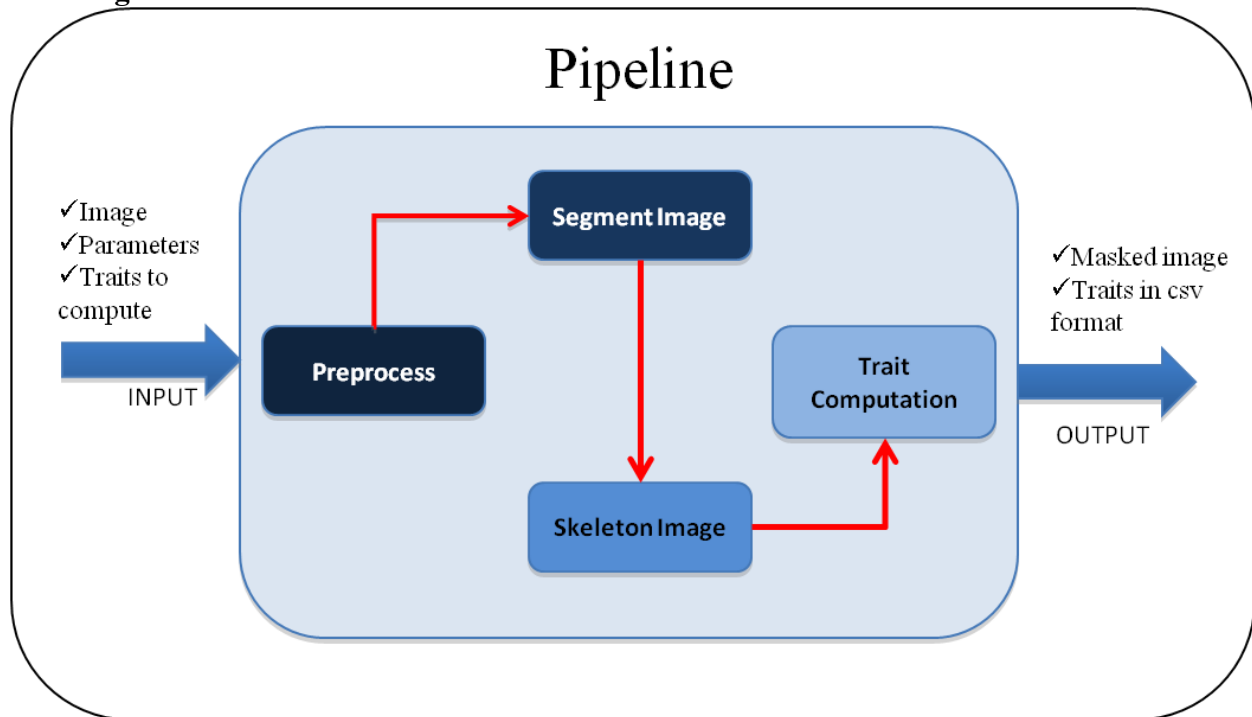

**Figure S1:** A schematic showing different steps of the DIRT RSA trait computation pipeline

## 9.2 Figure S2

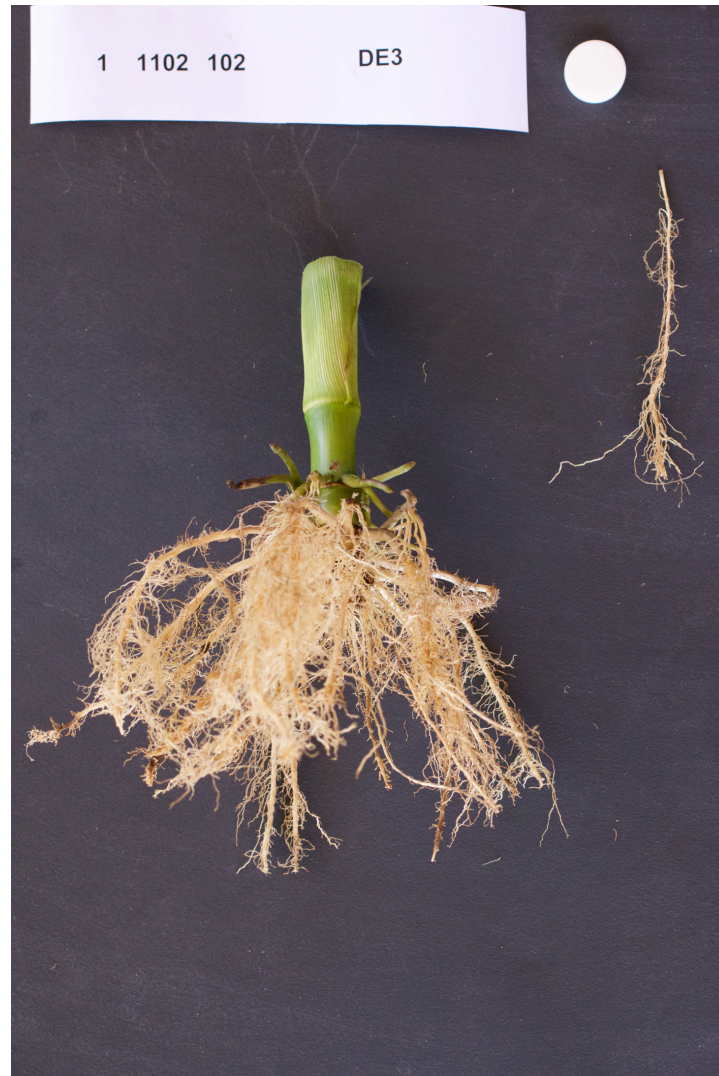

**Figure S2:** An example image that uses all DIRT image acquisition features[1]. The round scale marker is needed to recalculate pixels into units. The rectangular experiment tag is automatically detected and its content (letters or barcode) is stored in the result file. The root crown and the excised roots are separately analyzed.

### 9.3 Figure S3



## Digital Imaging of Root Traits

Getting to the roots of the crops!

[Login](#) | [Register](#) | [Help](#)

[HOME](#) [ABOUT](#) [ROOTS](#) [COMPUTATIONS](#) [CONTACT](#)

### Digital Imaging of Root Traits

Digital imaging of root traits (DIRT) is an automatic high throughput computing platform to measure phenotypic traits of monocot and dicot roots from digital photographs. DIRT extends and automates the extraction of phenotypic traits by utilizing high-throughput grid computing environment. Currently DIRT is available to our collaborators on the Georgia Tech PACE environment and to the public via the iPlant cyber infrastructure utilizing the TACC computing resources at UT Austin.



The obtained measurements are inspired by the Shovelomics field protocol used in many field experiments. Overall, DIRT derives over 30 phenotypic traits for monocot and dicot roots or excised root samples. DIRT is accessible online via this web application, which allows storage, organization and sharing of the image data and computing results. Our approach was highlighted on the *Plant Physiology* cover in October 2014.

**Unique features are:**

- Automatic processing and trait calculation from large data sets (> 1000 images) imaged with the DIRT protocol
- Virtual experiments through recombining existing image data from all accessible experiments
- Storage, sharing and organization of images within the whole user community, private or selected collaborators
- Output as excel compatible file
- Extensible with python through open source ([Source Link](#))
- Visual and statistical result control of all processing steps

**Supported by:**

 Powered by iPlant

 **TACC**  
TEXAS ADVANCED  
COMPUTING CENTER

 **Georgia  
Tech**

 **PACE**  
A Partnership for an Advanced Computing Environment

The system is partly financed by a seed grant from the Center for Data Analytics, Georgia Institute of Technology, Spatial Networks in Biology: Organizing and Analyzing the Structure of Distributed Biological Systems (A.Bucksch and J.S. Weitz) and partly funded by the NSF Plant Genome Research Program, NSF 0820624 (J.P. Lynch and J.S. Weitz)

Copyright © 2015 Digital Imaging of Root Traits

**Figure S3:** Screenshot of the DIRT home page.

## 9.4 Figure S4

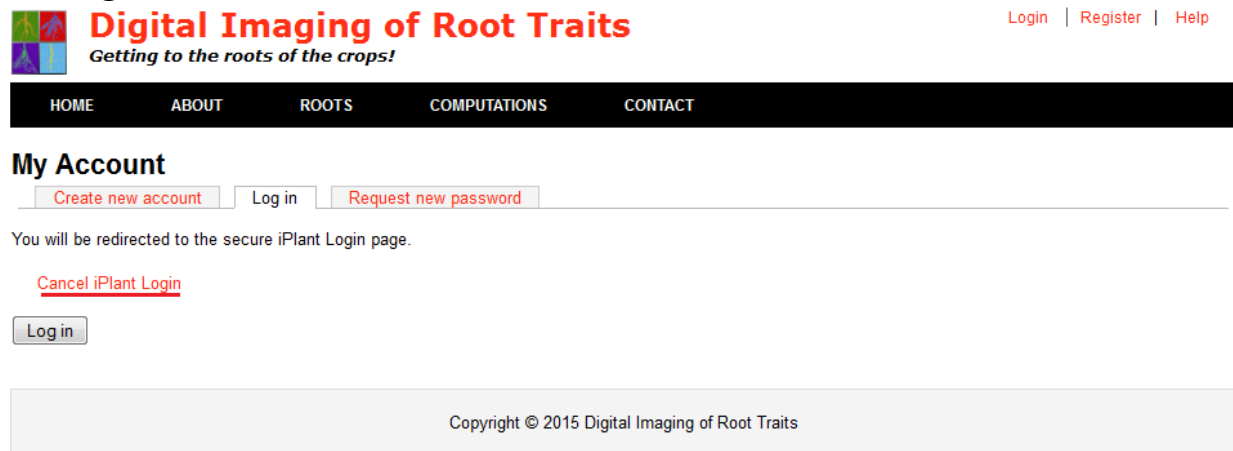

**Figure S4:** Screenshot of the DIRT user's login page. This is shown after clicking on the 'Login' link available at the top right corner of the DIRT home page.

## 9.5 Figure S5

**Digital Imaging of Root Traits**  
*Getting to the roots of the crops!*

Logged in as  | [Logout](#) | [Help](#)

HOMEABOUTROOTS ▼MARKED COLLECTIONSCALIBRATIONS ▼COMPUTATIONS ▼CONTACT

Create Root Image CollectionCREATE ROOT COLLECTION

Title \*

▼ Required Fields

Description \*

Text formatFiltered HTML ▼[More information about text formats ?](#)

- Web page addresses and e-mail addresses turn into links automatically.
- Allowed HTML tags: <a> <em> <strong> <cite> <blockquote> <code> <ol> <li> <dl> <dt> <dd>
- Lines and paragraphs break automatically.

Enter a brief description about the root image collection.

Root Image Collection License \*  
Attribution-NonCommercial ▼  
Select [Creative Commons License](#) type.

▼ Date of Plantation \*

Month \*Day \*Year \*

Jun ▼17 ▼2015 ▼

Select the date of plantation

▼ Date of Harvest \*

Month \*Day \*Year \*

Jun ▼17 ▼2015 ▼

Select date of harvest

Soil Moisture \*  
0.0  
Enter soil **soil** moisture content

Soil Nitrogen Level \*  
0.0 kg/ha  
Enter soil **nitrogen (N)** level in the units of **Kg/Ha**.

Soil Phosphorus Level \*  
0.0 kg/ha  
Enter soil **phosphorus (P)** level in the units of **Kg/Ha**

Soil Potassium Level \*  
0.0 kg/ha  
Enter soil **potassium (K)** level in the units of **Kg/Ha**.

**Figure S5:** Screenshot of the DIRT's user interface to create a root image collection. It shows a portion (i.e. required field's) of the entire interface. All field names shown here are self-explanatory. All fields have default values; with the exception of 'Title' and 'Description' fields, edit them as appropriate for the collection.

## 9.6 Figure S6

**Digital Imaging of Root Traits**  
*Getting to the roots of the crops!*

Logged in as  | [Logout](#) | [Help](#)

HOMEABOUTROOTS ▼MARKED COLLECTIONSCALIBRATIONS ▼COMPUTATIONS ▼CONTACT

### Home

#### Bulk Image Upload \*

| Filename                                                   | Size  | Status                                                                                 |
|------------------------------------------------------------|-------|----------------------------------------------------------------------------------------|
| IMG_3853.JPG                                               | 3 MB  | 0%  |
| IMG_3855.JPG                                               | 3 MB  | 0%  |
| IMG_3262.JPG                                               | 3 MB  | 0%  |
| <a href="#">+ Add files</a> <a href="#">↑ Start upload</a> | 23 MB | 0%                                                                                     |

Maximum of 200 images can be uploaded at once!  
Allowed file types: png gif jpg jpeg.

Default Values

**Member of Root Image Collection \***  

Maize-root-test-set

Select the root image collection.

**Root Visibility in Collection \***  

Public – accessible to all site users

**Genus \***  

Enter **genus** of the plant.

**Species**  

Enter **species** of the plant.

**Family**  

Enter name of plant family.

**Dry Biomass**  

0.0

 grams (g)  
Enter **dry biomass** of the root.

**Fresh Biomass**  

0.0

 grams (g)  
Enter **fresh biomass** of the root.

**SPAD Unit**  

0

  
Enter **Soil Plant Analysis Development (SPAD)** unit.

**Age**  
 DAP (Days After Plantation)  
Enter age **Days After Plantation** of the root.

**Resolution**  
 pixels/mm  
Enter image resolution (pixels/mm)

[Show row weights](#)

**Metadata**

+ +

Please enter the KEY

Please enter the VALUE

Enter metadata of the root image as a key value pair.

**Figure S6:** Screenshot of the DIRT’s user interface to upload and add images to a newly created or an existing collection. It shows a portion of the whole interface. This interface shows metadata fields associated to each image being uploaded to the collection. The red arrows indicate the links and fields that the use has to click and fill in respectively.

## 9.7 Figure S7

**Digital Imaging of Root Traits**  
*Getting to the roots of the crops!*

Logged in as  | [Logout](#) | [Help](#)

HOMEABOUTROOTS MARKED COLLECTIONSCALIBRATIONS COMPUTATIONS CONTACT

PublicMy

| Title                                         | Member since |
|-----------------------------------------------|--------------|
| Barley-test-images                            | May-12-2015  |
| bean roots test                               | May-12-2015  |
| Cowpea Diversity SouthAfrica 2013             | May-27-2015  |
| Maize (Bucksch et al. 2014, Plant Physiology) | May-22-2015  |
| Maize Validation Set                          | May-10-2015  |
| Maize-root-test-set                           | May-12-2015  |
| Rice grown in gellan gum                      | May-29-2015  |
| Technical Error Set Bean                      | May-22-2015  |
| Technical Error Set Maize                     | May-22-2015  |

Copyright © 2015 Digital Imaging of Root Traits

**Figure S7:** Screenshot of the DIRT's user interface that shows the list of root image collections managed by the logged in user.

## 9.8 Figure S8

The screenshot shows the DIRT web application interface. At the top, there is a logo with four colored squares (green, red, blue, yellow) and the text "Digital Imaging of Root Traits" in red, with the tagline "Getting to the roots of the crops!" below it. To the right of the logo, it says "Logged in as [redacted] | Logout | Help". Below the logo is a black navigation bar with white text links: HOME, ABOUT, ROOTS (with a dropdown arrow), MARKED COLLECTIONS, CALIBRATIONS (with a dropdown arrow), COMPUTATIONS (with a dropdown arrow), and CONTACT.

The main content area is titled "Maize Validation Set". Below the title are three buttons: "View" (highlighted in red), "Edit", and "Group". Below these buttons is a form for editing the collection. The form has a "Title" field with the text "Maize Validation Set". Below the title field are two sections: "Required Fields" and "Optional Fields", both with a red arrow pointing to the right. Below these sections is a "Collection Settings" section, which is expanded. It contains two sub-sections: "Collection roles and permissions" and "Collection Visibility". The "Collection roles and permissions" section has a dropdown menu set to "Use default roles and permissions" and a link "Manage collection roles and permissions.". The "Collection Visibility" section has two radio buttons: "Public - accessible to all site users" (selected) and "Private - accessible only to group members". Below the radio buttons is a link "Mark this collection as private or public.". At the bottom of the form are two buttons: "Save" and "Delete".

Copyright © 2015 Digital Imaging of Root Traits

**Figure S8:** Screenshot of the DIRT's user interface to edit a root image collection and change its collection setting to 'Public'.

## 9.9 Figure S9

The screenshot shows the DIRT web application interface. At the top, there is a logo with four colored squares (green, red, blue, yellow) and the text "Digital Imaging of Root Traits" in red, with the tagline "Getting to the roots of the crops!" below it. To the right of the logo, it says "Logged in as [redacted] | Logout | Help". Below the logo is a black navigation bar with white text links: HOME, ABOUT, ROOTS (with a dropdown arrow), MARKED COLLECTIONS, CALIBRATIONS (with a dropdown arrow), COMPUTATIONS (with a dropdown arrow), and CONTACT.

The main content area is titled "Maize Validation Set". Below the title are three buttons: "View", "Edit", and "Group" (highlighted in red). Below these buttons are four sections: "Add people" (with a red double-headed arrow icon and a link "Add group members."), "People" (with a link "Manage the group members."), "Permissions (read-only)" (with a link "View the group permissions."), and "Roles (read-only)" (with a link "View the group roles.").

Copyright © 2015 Digital Imaging of Root Traits

**Figure S9:** Screenshot of the DIRT's user interface that enables to add and manage members of a root image collection. The red arrow indicated the link the user has to click in order add people/member to the collection.

## 9.10 Figure S10


**Digital Imaging of Root Traits**  
*Getting to the roots of the crops!*

Logged in as  | [Logout](#) | [Help](#)

[HOME](#)
[ABOUT](#)
[ROOTS](#)
[MARKED COLLECTIONS](#)
[CALIBRATIONS](#)
[COMPUTATIONS](#)
[CONTACT](#)

[View](#)
[Edit](#)
[Group](#)

Cowpea Diversity panel collected by James Burridge at URBC, South Africa, 2013.

Root Image Collection License: [Attribution-NonCommercial-ShareAlike](#)

Images per page  
 50

Operations

☐ Select all items on this page  
 OR  
☐ Select all items on all pages

|               |               |               |               |               |
|---------------|---------------|---------------|---------------|---------------|
|               |               |               |               |               |
| DSC_0042.J... | DSC_0043.J... | DSC_0044.J... | DSC_0045.J... | DSC_0047.J... |
|               |               |               |               |               |
| DSC_0048.J... | DSC_0049.J... | DSC_0050.J... | DSC_0051.J... | DSC_0052.J... |
|               |               |               |               |               |
| DSC_0053.J... | DSC_0054.J... | DSC_0055.J... | DSC_0056.J... | DSC_0057.J... |
|               |               |               |               |               |
| DSC_0058.J... | DSC_0059.J... | DSC_0060.J... | DSC_0061.J... | DSC_0062.J... |
|               |               |               |               |               |
| DSC_0064.J... | DSC_0065.J... | DSC_0066.J... | DSC_0067.J... | DSC_1068.J... |
|               |               |               |               |               |
| DSC_1069.J... | DSC_1071.J... | DSC_1072.J... | DSC_1073.J... | DSC_1074.J... |

**Add Metadata**  
[Add Metadata](#)

**Add Images**  
[Add More Root Images](#)

**Request Membership**  
[Unsubscribe from group](#)

**Members**  
[abucksch](#)  
[abhi](#)

**Location**  


**Date of Plantation:** Feb-27-2013  
**Date of Harvest:** May-27-2013  
**Soil Moisture:** 0.00  
**Soil Nitrogen Level:** 0.00 kg/ha  
**Soil Phosphorus Level:** 0.00 kg/ha  
**Soil Potassium Level:** 0.00 kg/ha  
**Plant Disease Level:** 0

**Figure S10:** Screenshot of the DIRT's root image collection view interface. A user can perform all functions associated to a collection from this interface. Functions are (a) Edit collection metadata by clicking on the 'Edit' tab, (b) Add/manage people or member of the collection by clicking on the 'Group' tab, (c) Add images to a 'Marked Collection' (section 6.4), (d) Delete selected image(s), (e) Download image metadata, (f) Download images, (g) Add image metadata and (h) Add more root images to the collection. The red arrow indicates the major operations/actions that can be performed on a collection.

## 9.11 Figure S11

**Digital Imaging of Root Traits**  
*Getting to the roots of the crops!*

Logged in as [redacted] | [Logout](#) | [Help](#)

[HOME](#) [ABOUT](#) [ROOTS](#) [MARKED COLLECTIONS](#) [CALIBRATIONS](#) [COMPUTATIONS](#) [CONTACT](#)

### Create Metadata

**Title \***

**Root Collection \***  
[Maize Validation Set](#)

**Metadata File \***  
[Browse...](#) No file selected. [Upload](#)

Upload a csv file ([Sample File](#)) containing metadata information for the images uploaded to selected data set. Each row in the csv file should contain information for each image. The information (image file name, genus, species, genotype) for each image should be in specified order.  
Files must be less than **1 GB**.  
Allowed file types: **csv**.

[Save](#)

Copyright © 2015 Digital Imaging of Root Traits

**Figure S11:** Screenshot of the DIRT's interface to add/update metadata of images in a collection.

## 9.12 Figure S12

**Digital Imaging of Root Traits**  
*Getting to the roots of the crops!*

Logged in as [redacted] | [Logout](#) | [Help](#)

[HOME](#) [ABOUT](#) [ROOTS](#) [MARKED COLLECTIONS](#) [CALIBRATIONS](#) [COMPUTATIONS](#) [CONTACT](#)

[View](#) [Edit](#) [Group](#)

Cowpea Diversity panel collected by James Burridge at URBC, South Africa, 2013.

Root Image Collection License: [Attribution-NonCommercial-ShareAlike](#)

**Do you have marked collection? \***  
☐ Yes  
☒ No

**Enter Name of New Marked Collection \***

[Next](#) [Cancel](#)

**Add Metadata**  
[Add Metadata](#)

**Add Images**  
[Add More Root Images](#)

**Request Membership**  
[Unsubscribe from group](#)

**Members**  
[abucksch](#)  
[abhi](#)

**Figure S12:** Screenshot of the DIRT's interface to create a new marked collection and add images to it. The red arrow indicates the fields that need user's attention.

### 9.13 Figure S13

The screenshot shows the DIRT web application interface. At the top, there is a header with the logo and title "Digital Imaging of Root Traits" and the tagline "Getting to the roots of the crops!". The user is logged in as a red square, with links for "Logout" and "Help". Below the header is a navigation bar with links: HOME, ABOUT, ROOTS, MARKED COLLECTIONS, CALIBRATIONS, COMPUTATIONS, and CONTACT. The main content area has a sub-header with "View", "Edit", and "Group" buttons. Below this, it says "Cowpea Diversity panel collected by James Burridge at URBC, South Africa, 2013." and "Root Image Collection License: Attribution-NonCommercial-ShareAlike". A question "Do you have marked collection? \*" is followed by radio buttons for "Yes" (selected) and "No". Below this is a dropdown menu "Select A Marked Collection \*" with a list of collections: beans-test, maize-test, barley-test, beans-test (highlighted), Rice-Roots, and cowpea-diversity-sa-2013. To the right, there are links for "Add Metadata", "Add Images", "Request Membership", and "Members".

Logged in as | [Logout](#) | [Help](#)

**HOME** **ABOUT** **ROOTS** **MARKED COLLECTIONS** **CALIBRATIONS** **COMPUTATIONS** **CONTACT**

View Edit Group

Cowpea Diversity panel collected by James Burridge at URBC, South Africa, 2013.

Root Image Collection License: Attribution-NonCommercial-ShareAlike

Do you have marked collection? \*

☒ Yes ☐ No

Select A Marked Collection \*

- beans-test
- maize-test
- barley-test
- beans-test
- Rice-Roots
- cowpea-diversity-sa-2013

**Add Metadata**  
[Add Metadata](#)

**Add Images**  
[Add More Root Images](#)

**Request Membership**  
[Unsubscribe from group](#)

**Members**  
[abucksch](#)  
[abhi](#)

**Figure S13:** Screenshot of the DIRT's interface to add images to an existing marked collection. The red arrow indicates the fields that need user's attention.

### 9.14 Figure S14

The screenshot shows the DIRT web application interface. At the top, there is a header with the logo and title "Digital Imaging of Root Traits" and the tagline "Getting to the roots of the crops!". The user is logged in as a red square, with links for "Logout" and "Help". Below the header is a navigation bar with links: HOME, ABOUT, ROOTS, MARKED COLLECTIONS, CALIBRATIONS, COMPUTATIONS, and CONTACT. The main content area has a sub-header with "Operations" and a button "Delete Marked Collections". Below this is a table with columns: Title, # Root Images, and Size. The table lists several collections: cowpea-diversity-sa-2013, Rice-Roots, beans-test, maize-test, and barley-test. A red arrow points to the checkbox next to the first row. At the bottom, there is a footer with the text "Copyright © 2015 Digital Imaging of Root Traits".

Logged in as | [Logout](#) | [Help](#)

**HOME** **ABOUT** **ROOTS** **MARKED COLLECTIONS** **CALIBRATIONS** **COMPUTATIONS** **CONTACT**

Operations

Delete Marked Collections

| <input type="checkbox"/>            | Title                    | # Root Images | Size      |
|-------------------------------------|--------------------------|---------------|-----------|
| <input checked="" type="checkbox"/> | cowpea-diversity-sa-2013 | 1, 500        | 3.62 GB   |
| <input type="checkbox"/>            | Rice-Roots               | 2, 406        | 471.8 MB  |
| <input type="checkbox"/>            | beans-test               | 15            | 32.69 MB  |
| <input type="checkbox"/>            | maize-test               | 20            | 50.31 MB  |
| <input type="checkbox"/>            | barley-test              | 3             | 935.72 KB |

Copyright © 2015 Digital Imaging of Root Traits

**Figure S14:** Screenshot of the DIRT's interface that lists the marked collections of the logged in user. The red arrow indicates the fields that need user's attention/action to delete a marked collection.

## 9.15 Figure S15

 **Digital Imaging of Root Traits**  
Getting to the roots of the crops!

Logged in as  | [Logout](#) | [Help](#)

HOME ABOUT ROOTS MARKED COLLECTIONS **CALIBRATIONS** COMPUTATIONS CONTACT

beans-test Go

**CALIBRATE**

Calibration process computes binary masked images for different threshold values of 1, 3, 5, 10, 15 and 20.

“ Therefore, it make take a while depending on the image resolution. We suggest you use images of medium resolution i.e. less than 2K x 2K pixels.

Operations

Calibrate Threshold

|                                                                                                   |                                                                                                   |                                                                                                   |                                                                                                    |                                                                                                     |
|---------------------------------------------------------------------------------------------------|---------------------------------------------------------------------------------------------------|---------------------------------------------------------------------------------------------------|----------------------------------------------------------------------------------------------------|-----------------------------------------------------------------------------------------------------|
| <br>DSC_1867.jpg | <br>DSC_1868.jpg | <br>DSC_1869.jpg | <br>DSC_1870.jpg | <br>DSC_1871.jpg |
| <br>DSC_1872.jpg | <br>DSC_1873.jpg | <br>DSC_1874.jpg | <br>DSC_1875.jpg | <br>DSC_1876.jpg |

Copyright © 2015 Digital Imaging of Root Traits

**Figure S15:** Screenshot of the DIRT’s interface to calibrate segmentation threshold value for an image in the marked collection. It works in two steps (a) Select a marked collection from the list as seen in the above figure and click ‘Go’, this will load the images of the marked collection, and (b) select an image and click on ‘Calibrate Threshold’ button. The red arrow indicates the fields/buttons that need user’s attention/action for threshold calibration.

## 9.16 Figure S16

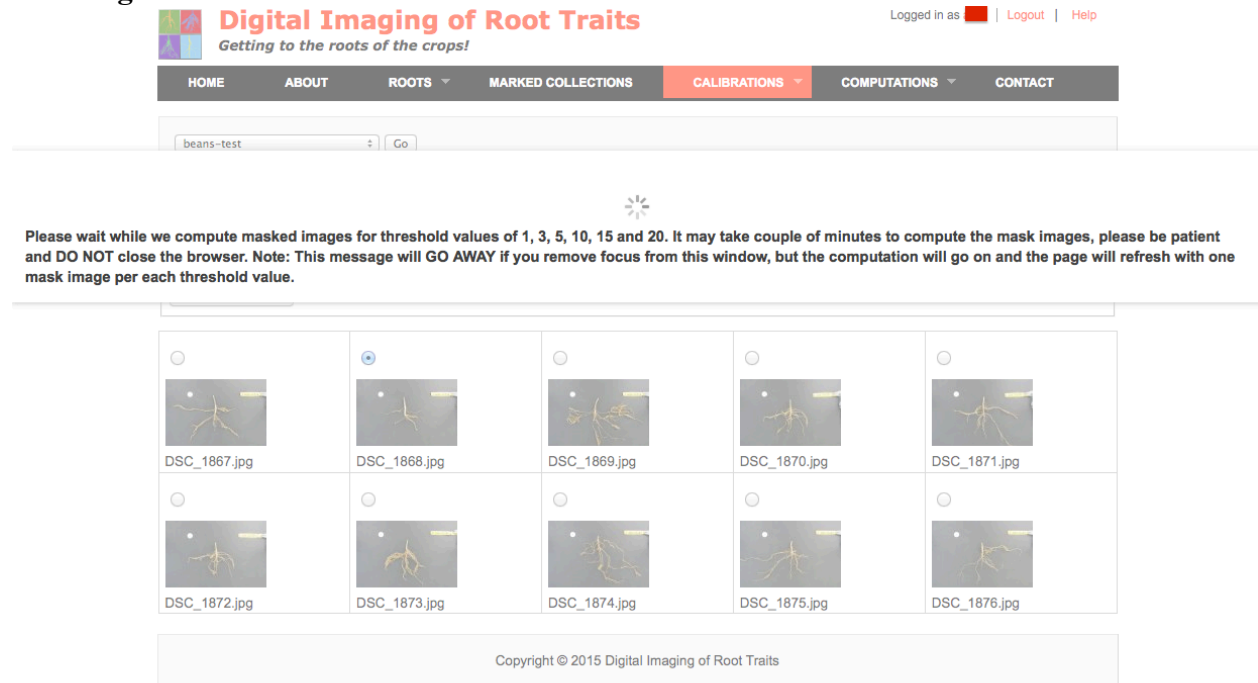

**Figure S16:** Screenshot of the DIRT's interface that shows up while an image is being calibrated by a user.

## 9.17 Figure S17

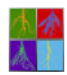

### Digital Imaging of Root Traits

Getting to the roots of the crops!

Logged in as  | [Logout](#) | [Help](#)

[HOME](#)

[ABOUT](#)

[ROOTS](#) ▾

[MARKED COLLECTIONS](#)

[CALIBRATIONS](#) ▾

[COMPUTATIONS](#) ▾

[CONTACT](#)

“ Move the mouse over to the masked image to see the corresponding threshold value used! ”

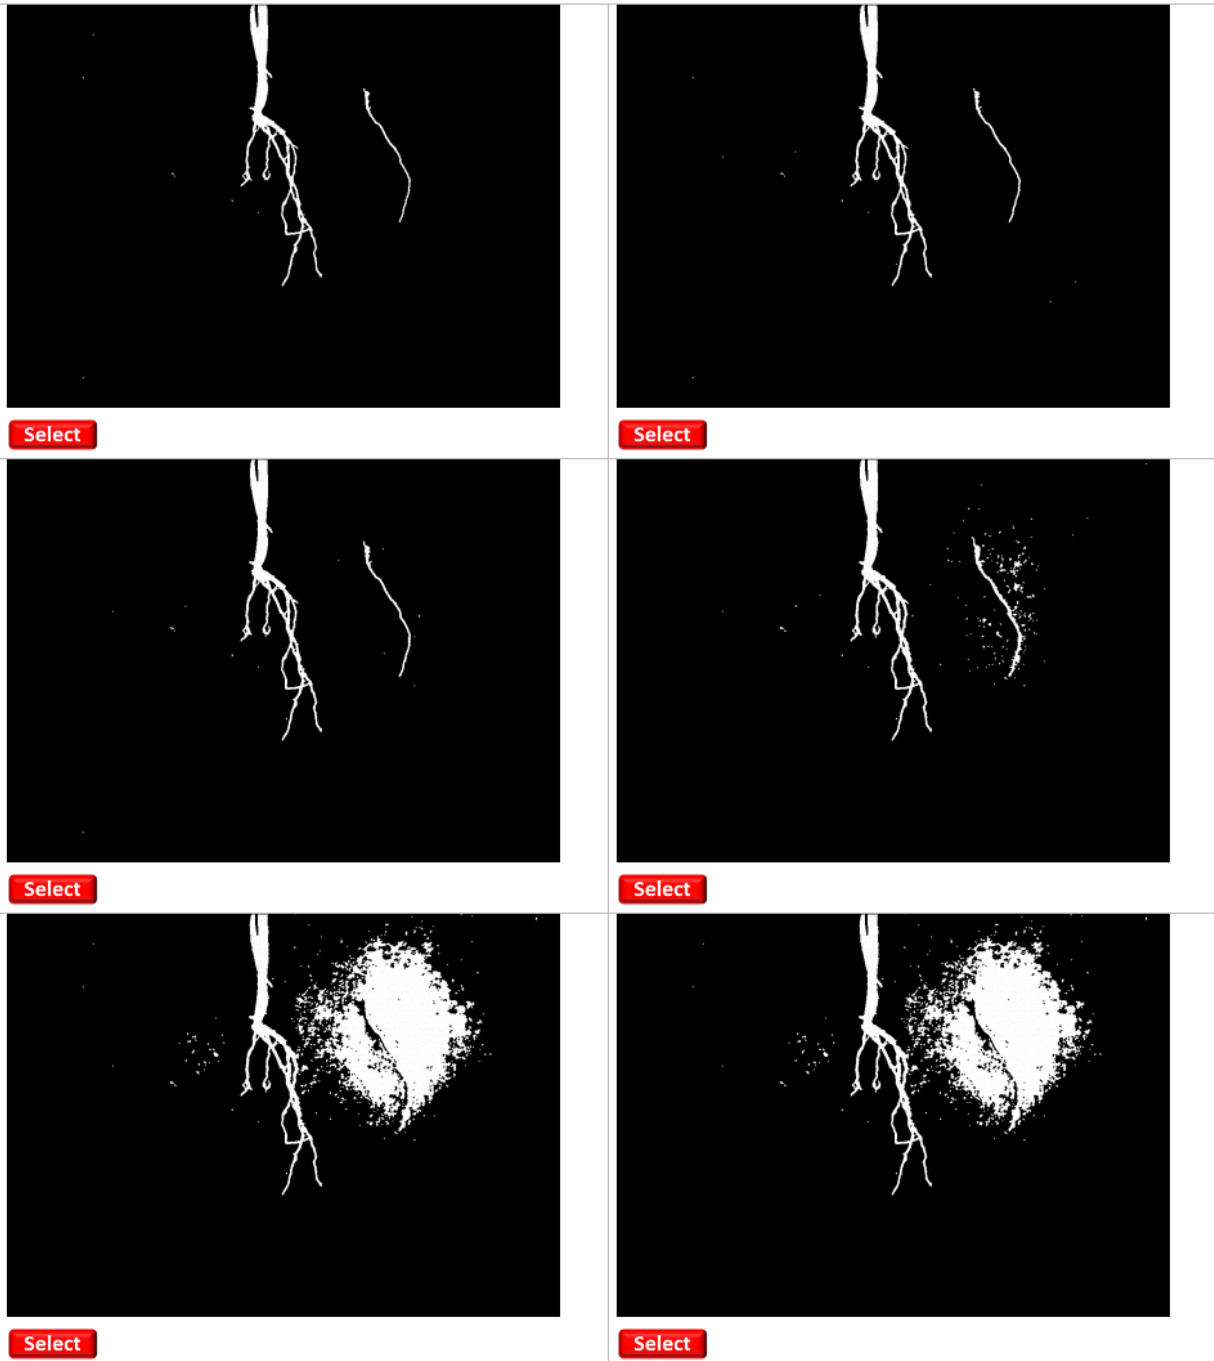

**Figure S17:** Screenshot of the DIRT's interface that shows up on completion of the calibration. All masked images with threshold values are presented to the user for inspection and selection.

## 9.18 Figure S18


**Digital Imaging of Root Traits**  
*Getting to the roots of the crops!*

Logged in as  | [Logout](#) | [Help](#)

[HOME](#)
[ABOUT](#)
[ROOTS](#)
[MARKED COLLECTIONS](#)
[CALIBRATIONS](#)
[COMPUTATIONS](#)
[CONTACT](#)

Operations
 

Delete Calibrated Images

| <input type="checkbox"/> | Parent Image                                                                                                            | Calibrated Images                                                                    |                        |
|--------------------------|-------------------------------------------------------------------------------------------------------------------------|--------------------------------------------------------------------------------------|------------------------|
| <input type="checkbox"/> | <b>IMG_2272.JPG</b><br>                |    | <a href="#">Select</a> |
| <input type="checkbox"/> | <b>DSC_1867.jpg</b><br>                |    | <a href="#">Select</a> |
| <input type="checkbox"/> | <b>Tequing-10-04180820cc.jpg</b><br> |  | <a href="#">Select</a> |

Copyright © 2015 Digital Imaging of Root Traits

**Figure S18:** Screenshot of the DIRT's interface that shows the list of calibrations performed by a user.

## 9.19 Figure S19

**Digital Imaging of Root Traits**  
*Getting to the roots of the crops!*

Logged in as  | [Logout](#) | [Help](#)

HOMEABOUTROOTS ▼MARKED COLLECTIONSCALIBRATIONS ▼COMPUTATIONS ▼CONTACT

CREATE COMPUTATION

### Create Computation

Computation Details

**Title \***  
Cowpea-Diversity-SA-2013

**Marked Root Image Collection \***  
cowpea-diversity-sa-2013

Select the marked image collection.

**Pipeline \***  
DIRT\_Py

Select the image processing pipeline.

**Masking Threshold \***  
1

Please enter the image masking threshold value OR use the **Calibrate** functionality to get the value.

**Scale Marker \***  
25.4

Enter the scale marker value.

☒ **Require Segmentation**  
Select if images require segmentation.

☐ **Require Stem Reconstruction**  
Select if stem needs reconstruction.

☒ **Has Root Crown**  
Select if root image has crown root.

**Number of Excised Roots**  
0

Please select the number of excised roots present in the root image.

Common Traits

Dicot Root Traits

Monocot Root Traits

Select All Monocot Traits  
Select All Monocot Traits

☐ Root Top Angle

☐ Root Bottom Angle

Excised Root Traits

Computation Settings

Save

**Figure S19:** Screenshot of the DIRT’s interface to create a new computation. This interface enables the user to give a title to the computation, select the marked collection whose images are to be used for trait computation, select the trait computation pipeline, provide pipeline parameters and select traits of interest. The red arrow indicates the fields that need user’s attention.

## 9.20 Figure S20

**Digital Imaging of Root Traits**  
*Getting to the roots of the crops!*

Logged in as  | [Logout](#) | [Help](#)

HOMEABOUTROOTS ▼MARKED COLLECTIONSCALIBRATIONS ▼COMPUTATIONS ▼CONTACT

PublicMy 

Title

Search

| Title                                    | Submitted Date ▼   | Status    |
|------------------------------------------|--------------------|-----------|
| Cowpea-Diversity-SA-2013                 | 06/17/2015 - 15:02 | Submitted |
| comp-fast-submission-test                | 06/12/2015 - 12:43 | Completed |
| Rice-Roots-Gellan-Gum-Iyer-Pascuzzi-2010 | 06/12/2015 - 11:38 | Completed |
| Rice Roots - I                           | 06/09/2015 - 15:03 | Completed |
| admin-test                               | 06/09/2015 - 13:10 | Completed |
| 200-rice-roots                           | 06/08/2015 - 19:22 | Completed |
| Maize-Validation                         | 05/11/2015 - 12:08 | Completed |

Copyright © 2015 Digital Imaging of Root Traits

**Figure S20:** Screenshot of the DIRT's interface that shows the list of computations managed/associated to the logged in user. The red arrow indicates the fields that need user's attention/action.

## 9.21 Figure S21

**Digital Imaging of Root Traits**  
*Getting to the roots of the crops!*

Logged in as  | [Logout](#) | [Help](#)

HOMEABOUTROOTS MARKED COLLECTIONSCALIBRATIONS COMPUTATIONS CONTACT

### Maize-Validation

ViewEditGroup

Computation Details

Title \*

Maize-Validation

Marked Root Image Collection \*

beans-test

Select the marked image collection.

Pipeline \*

DIRT\_Py

Select the image processing pipeline.

Masking Threshold \*

20.00

Please enter the image masking threshold value OR use the **Calibrate** functionality to get the value.

Scale Marker \*

25.40

Enter the scale marker value.

☒ Require Segmentation

Select if images require segmentation.

☒ Has Root Crown

Select if root image has crown root.

Number of Excised Roots

0

Please select the number of excised roots present in the root image.

Common Traits

Dicot Root Traits

Monocot Root Traits

Excised Root Traits

Computation Settings

Computation Visibility \*

☒ Public - accessible to all site users

☐ Private - accessible only to group members

Mark the computation visibility private or public.

Computation roles and permissions \*

Use default roles and permissions

Manage computation roles and permissions.

SaveDelete

**Figure S21:** Screenshot of the DIRT's interface that enables user to start/create a RSA trait computation process on the underlying high-throughput grid computing environment. The red arrow indicates the fields that need user's attention/action.

## 9.22 Figure S22

**Digital Imaging of Root Traits**  
*Getting to the roots of the crops!*

Logged in as  | [Logout](#) | [Help](#)

[HOME](#) [ABOUT](#) [ROOTS](#) [MARKED COLLECTIONS](#) [CALIBRATIONS](#) [COMPUTATIONS](#) [CONTACT](#)

[View](#) [Edit](#) [Group](#)

### Cowpea-Diversity-SA-2013

Pipeline: **DIRT\_Py**

Masking Threshold: 1.00

Scale Marker: 25.40

Has Root Crown: 1

Status: Submitted

Require Segmentation: 1

Require Stem Reconstruction: 0

Number of Excised Roots: 0

**Message:**  
Your job was added to the processing queue. You will be notified via email upon completion!

**Request Membership**  
You are the group manager

**Members**  
[abhi](#)

**Cancel Job**

**Cancel** 

Images per page

60  [Apply](#)

Operations

[Delete Output](#)

There are no outputs for the job.

Copyright © 2015 Digital Imaging of Root Traits

**Figure S22:** Screenshot of the DIRT's interface that allows the user to cancel a submitted or running computation. The red arrow indicates the button that need user's action to cancel a computation.

## 9.23 Figure S23


**Digital Imaging of Root Traits**  
*Getting to the roots of the crops!*

Logged in as  | [Logout](#) | [Help](#)

[HOME](#)
[ABOUT](#)
[ROOTS](#)
[MARKED COLLECTIONS](#)
[CALIBRATIONS](#)
[COMPUTATIONS](#)
[CONTACT](#)

### Maize-Cadriano\_Traits

Pipeline: **DIRT\_Py**  
 Masking Threshold: 3.00  
 Scale Marker: 25.40  
 Has Root Crown: 1  
 Status: Completed

Require Segmentation: 1  
 Require Stem Reconstruction: 0  
 Number of Excised Roots: 0  
 Image Metadata:  [30937\\_image\\_meta.csv](#)  
 Computed Traits:  [30937\\_output.csv](#)

**Request Membership**  
[Request group membership](#)  
**Members**  
[Anakarine](#)

Images per page

Operations

☐ Select all items on this page

|                                                                                                                                                                                                                  |                                                                                                                                                                                                                  |                                                                                                                                                                                                                  |                                                                                                                                                                                                                  |                                                                                                                                                                                                                     |                                                                                                                                                                                                                      |
|------------------------------------------------------------------------------------------------------------------------------------------------------------------------------------------------------------------|------------------------------------------------------------------------------------------------------------------------------------------------------------------------------------------------------------------|------------------------------------------------------------------------------------------------------------------------------------------------------------------------------------------------------------------|------------------------------------------------------------------------------------------------------------------------------------------------------------------------------------------------------------------|---------------------------------------------------------------------------------------------------------------------------------------------------------------------------------------------------------------------|----------------------------------------------------------------------------------------------------------------------------------------------------------------------------------------------------------------------|
| <br><br><a href="#">30914-Maize-Cad...</a>     | <br><br><a href="#">30915-Maize-Cad...</a>     | <br><br><a href="#">30916-Maize-Cad...</a>     | <br><br><a href="#">30917-Maize-Cad...</a>     | <br><br><a href="#">30918-Maize-Cad...</a>     | <br><br><a href="#">30919-Maize-Cad...</a>     |
| <br><br><a href="#">30920-Maize-Cad...</a> | <br><br><a href="#">30921-Maize-Cad...</a> | <br><br><a href="#">30922-Maize-Cad...</a> | <br><br><a href="#">30923-Maize-Cad...</a> | <br><br><a href="#">30924-Maize-Cad...</a> | <br><br><a href="#">30925-Maize-Cad...</a> |
| <br><br><a href="#">30926-Maize-Cad...</a> | <br><br><a href="#">30927-Maize-Cad...</a> | <br><br><a href="#">30928-Maize-Cad...</a> | <br><br><a href="#">30929-Maize-Cad...</a> | <br><br><a href="#">30930-Maize-Cad...</a> | <br><br><a href="#">30931-Maize-Cad...</a> |
| <br><br><a href="#">30932-Maize-Cad...</a> | <br><br><a href="#">30933-Maize-Cad...</a> |                                                                                                                                                                                                                  |                                                                                                                                                                                                                  |                                                                                                                                                                                                                     |                                                                                                                                                                                                                      |

Copyright © 2015 Digital Imaging of Root Traits

**Figure S23:** Screenshot of the DIRT's interface of a completed computation. The user can visually inspect the masked images and download the computed traits and metadata. The red arrow indicates the fields that need user's attention/action.

## 9.24 Figure S24

**Digital Imaging of Root Traits**  
*Getting to the roots of the crops!*

Logged in as  | [Logout](#) | [Help](#)

HOMEABOUTROOTSMARKED COLLECTIONSCALIBRATIONS↓COMPUTATIONS↓CONTACT

ViewEdit

**4105.JPG**  


**Member of Computation:** Maize-Validation

**Traits File:**  5550eae723f28\_traits.rsml

  


**Experiment Number:** No label found

**1st dominant angle at 25% of the RTP length:** 45.03410000

**1st dominant angle at 50% of the RTP length:** 73.44

**1st dominant angle at 75% of the RTP length:** 55.24

**1st dominant angle at 90% of the RTP length:** 55.30

**2nd dominant angle at 25% of the RTP length:** 26.23

**2nd dominant angle at 50% of the RTP length:** 46.25

**2nd dominant angle at 75% of the RTP length:** -1.00

**2nd dominant angle at 90% of the RTP length:** 15.34

**50 % drop in diameter:** 228.72

**Accumulated width over 10 percent depth:**  
0.31

**Roots Seg 2:** 105

**Roots Seg 1:** 42

**Rooting depth skeleton:** 228.48

**Root Tissue Angle Range:** 76.28

**Root Top Angle:** 4.26

**RTA dominant angle 1:** 55.02

**Figure S24:** Screenshot of the DIRT's interface showing computed traits of a single image. The computed traits are available for download in the form of a RSML file. Note, this figure is not showing all the traits, but all the computed traits can actually be seen on the site by scrolling down the page.

## 9.25 Figure S25

**Digital Imaging of Root Traits**  
*Getting to the roots of the crops!*

Logged in as  | [Logout](#) | [Help](#)

HOMEABOUTROOTS ▼MARKED COLLECTIONSCALIBRATIONS ▼COMPUTATIONS ▼CONTACT

ViewEdit

First Name: Abhiram

Last Name: Das

About You: Grad student

Site: <http://ecothery.biology.gatech.edu/people/abhiram-das>

**Your Disk Usage**

| Limit  | Used     |
|--------|----------|
| 100 GB | 96.69 MB |

**Your Daily File Transfer Usage**

| Limit | Used    |
|-------|---------|
| 10 GB | 2.07 MB |

Copyright © 2015 Digital Imaging of Root Traits

**Figure S25:** Screenshot of the DIRT's interface showing user profile details.

## 9.26 Figure S26

 [Dashboard](#) [Content](#) [Structure](#) [Appearance](#) [People](#) [Modules](#) [Configuration](#) [Reports](#) [Help](#)

---

▼ **DIRT SERVER**

DIRT Remote computation server information

**Server Name \***

Hostname of the remote server running the DIRT computation .

**User Home Directory Name \***

Home directory of user on remote server.

**User Work Directory Name \***

Work directory of user on remote server.

**User Name \***

User login name for the remote server.

**Password \***

User password for the remote server.

---

▼ **WEB SERVER**

Local Web server information

**Scripts Directory Name \***

Local directory where scripts are located.

**Local Working Directory Name \***

**Figure S26:** Screenshot of the DIRT's administration interface to configure grid computing platform information.

## 9.27 Figure S27

Dashboard | Content | Structure | Appearance | People | Modules | Configuration | Reports | Help

Home » Administration » Configuration

### DIRT Quota Configuration

▼ **DIRT QUOTA LIMITS**

DIRT Quota Limits

**Daliy Quota \***

10 GB

Enter a value like "512" (bytes), "80 KB" (kilobytes) or "50 MB" (megabytes) or "1 GB" (gigabytes)

Save configuration

**Figure S27:** Screenshot of the DIRT's administration interface to configure user's daily computation quota information.

## 9.28 Figure S28

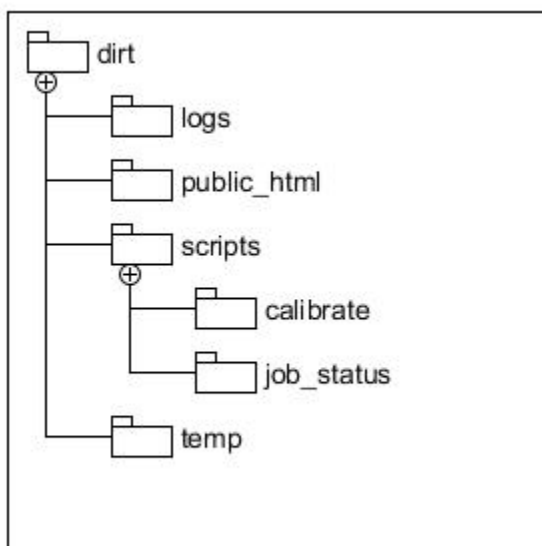

**Figure S28:** Directory structure on DIRT web server node

## 9.29 Figure S29

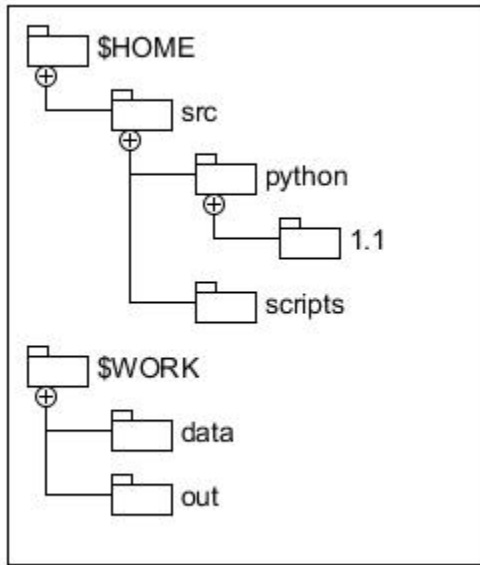

**Figure S29:** Directory structure on DIRT grid node

## 10 References

- [1] A. Bucksch, J. Burridge, L. M. York, A. Das, E. Nord, J. S. Weitz, and J. P. Lynch, "Image-Based High-Throughput Field Phenotyping of Crop Roots," *Plant Physiology*, vol. 166, no. 2, pp. 470-486, Oct, 2014.
- [2] T. Colombi, N. Kirchgessner, C. A. Le Marie, L. M. York, J. P. Lynch, and A. Hund, "Next generation shovelomics: set up a tent and REST," *Plant and Soil*, vol. 388, no. 1-2, pp. 1-20, Mar, 2015.
- [3] T. Galkovskyi, Y. Mileyko, A. Bucksch, B. Moore, O. Symonova, C. A. Price, C. N. Topp, A. S. Iyer-Pascuzzi, P. R. Zurek, S. Q. Fang, J. Harer, P. N. Benfey, and J. S. Weitz, "GiA Roots: software for the high throughput analysis of plant root system architecture," *Bmc Plant Biology*, vol. 12, Jul 26, 2012.
- [4] M. A. Fischler, and R. C. Bolles, "Random Sample Consensus - a Paradigm for Model-Fitting with Applications to Image-Analysis and Automated Cartography," *Communications of the Acm*, vol. 24, no. 6, pp. 381-395, 1981.
- [5] G. Lobet, M. P. Pound, J. Diener, C. Pradal, X. Draye, C. Godin, M. Javaux, D. Leitner, F. Meunier, P. Nacry, T. P. Pridmore, and A. Schnepf, "Root System Markup Language: Toward a Unified Root Architecture Description Language," *Plant Physiology*, vol. 167, no. 3, pp. 617-627, Mar, 2015.
- [6] A. Bucksch, "A Practical Introduction to Skeletons for the Plant Sciences," *Applications in Plant Sciences*, vol. 2, no. 8, Aug, 2014.
- [7] A. S. Iyer-Pascuzzi, O. Symonova, Y. Mileyko, Y. L. Hao, H. Belcher, J. Harer, J. S. Weitz, and P. N. Benfey, "Imaging and Analysis Platform for Automatic Phenotyping and Trait Ranking of Plant Root Systems," *Plant Physiology*, vol. 152, no. 3, pp. 1148-1157, Mar, 2010.
- [8] Y. L. Chen, V. M. Dunbabin, J. A. Postma, A. J. Diggle, J. A. Palta, J. P. Lynch, K. H. M. Siddique, and Z. Rengel, "Phenotypic variability and modelling of root structure of wild *Lupinus angustifolius* genotypes," *Plant and Soil*, vol. 348, no. 1-2, pp. 345-364, Nov, 2011.
- [9] "Drupal, <https://www.drupal.org/> [Accessed 16 June 2015]."
- [10] "STAMPEDE at TACC. <https://www.tacc.utexas.edu/systems/stampede> [Accessed 16 June 2015]."
